## 1 **Binding and sequestration of poison frog alkaloids by a plasma globulin**

2 Aurora Alvarez-Buylla<sup>1\*</sup>, María Dolores Moya Garzón<sup>2,3</sup>, Alexandra E. Rangel<sup>4</sup>, Elicio E. Tapia<sup>5</sup>,  
3 H. Tom Soh<sup>4,6,7</sup>, Luis A. Coloma<sup>5</sup>, Jonathan Z. Long<sup>2,3,8,9</sup>, Lauren A. O’Connell<sup>1,3,10\*</sup>

4 <sup>1</sup>Department of Biology, Stanford University, Stanford, CA, USA

5 <sup>2</sup>Department of Pathology, Stanford University, Stanford, CA, USA

6 <sup>3</sup>Sarafan ChEM-H, Stanford University, Stanford, CA, USA

7 <sup>4</sup>Department of Radiology, Stanford University, Stanford, CA, USA

8 <sup>5</sup>Centro Jambatu de Investigación y Conservación de Anfibios, Fundación Jambatu, San Rafael,  
9 Quito, Ecuador

10 <sup>6</sup>Department of Electrical Engineering, Stanford University, Stanford, CA, USA

11 <sup>7</sup>Chan Zuckerberg Biohub, San Francisco, CA, USA.

12 <sup>8</sup>Stanford Diabetes Research Center, Stanford University, Stanford, CA, USA

13 <sup>9</sup>Wu Tsai Human Performance Alliance, Stanford University, Stanford, CA, USA

14 <sup>10</sup>Wu Tsai Institute for Neuroscience, Stanford University, Stanford, CA, USA

15 \*corresponding authors: [auroraab@stanford.edu](mailto:auroraab@stanford.edu), [loconnel@stanford.edu](mailto:loconnel@stanford.edu)

16 **Key words:** plasma globulin, alkaloid binding, serpin, protein evolution

17 **Running title:** Alkaloid-Binding Globulin (ABG)

## 18 **ABSTRACT**

19 Alkaloids are important bioactive molecules throughout the natural world, and in many animals  
20 they serve as a source of chemical defense against predation. Dendrobatid poison frogs  
21 bioaccumulate alkaloids from their diet to make themselves toxic or unpalatable to predators.  
22 Despite the proposed roles of plasma proteins as mediators of alkaloid trafficking and  
23 bioavailability, the responsible proteins have not been identified. We use chemical approaches to  
24 show that a ~50 kDa plasma protein is the principal alkaloid binding molecule in blood from poison  
25 frogs. Proteomic and biochemical studies establish this plasma protein to be liver-derived alkaloid-  
26 binding globulin (ABG) that is a member of the serine-protease inhibitor (serpin) family. In addition  
27 to alkaloid binding activity, ABG sequesters and regulates the bioavailability of “free” plasma  
28 alkaloids *in vitro*. Unexpectedly, ABG is not related to saxiphilin or albumin, but instead exhibits  
29 sequence and structural homology to mammalian hormone carriers and amphibian biliverdin  
30 binding proteins. Alkaloid-binding globulin (ABG) represents a new small molecule binding  
31 functionality in serpin proteins, a novel mechanism of plasma alkaloid transport in poison frogs,  
32 and more broadly points towards serpins acting as tunable scaffolds for small molecule binding  
33 and transport across different organisms.

34

## 35 1. INTRODUCTION

36 Alkaloids are nitrogenous small molecules that play important ecological and physiological  
37 roles throughout nature, one of which is mediating predator-prey interactions. Species across  
38 many taxa, including plants, insects, marine invertebrates, and vertebrates, have co opted  
39 alkaloids as chemical defenses, methods for hunting, and pheromone signals. Some of the most  
40 potent alkaloid toxins, including batrachotoxin (BTX), saxitoxin (STX), and tetrodotoxin (TTX), act  
41 specifically by affecting voltage gated sodium (NaV), potassium, and calcium channels, leading  
42 to disruption of nerve and muscle cells [1–3]. In the blue-ringed octopus, *Hapalochlaena lunulata*,  
43 TTX is used to paralyze prey [4], while in the pufferfish *Takifugu niphobles* it also acts as a  
44 pheromone [5], and in the California newt *Taricha torosa* it is a defense against predation [6].  
45 Other less-potent alkaloids also play important roles in predator prey interactions. For example,  
46 Lepidoptera insects (butterflies and moths) and Coleoptera beetles sequester pyrrolizidine  
47 alkaloids from plants for predation defense and production of pheromones [7,8]. Although the  
48 identities of these alkaloids are well documented, less is known about the physiological  
49 mechanisms that allow animals to produce, sequester, and autorepist these small molecules.  
50 Identifying and characterizing proteins that interact with alkaloids in these ecological contexts  
51 allows us to better understand how animal physiology has coevolved with alkaloids.

52 Despite the important ecological and physiological roles of alkaloids in animals, the  
53 molecular mechanisms involved in alkaloid production, transport, and resistance have been more  
54 elusive and typically focused on a single alkaloid or specific structural class of alkaloids. In  
55 grasshoppers and moths, passive absorption of pyrrolizidine alkaloids is followed by conversion  
56 into a non-toxic form by haemolymph flavin-dependent monooxygenase, allowing the insects to  
57 avoid autointoxication [9]. In some beetle species, ATP-binding cassette (ABC) transporters  
58 actively pump pyrrolizidine alkaloids into reservoir defensive glands [10]. In vertebrates, the  
59 proteins that allow for the sequestration of alkaloids without autotoxicity are unclear with the  
60 exception of previous work with TTX and STX. The pufferfish saxitoxin and tetrodotoxin binding  
61 protein (PSTBP) was originally identified in the plasma of *Fugu pardalis* [11], and is thought to  
62 play a role in the transport of TTX and STX to the site of bioaccumulation in the liver and ovaries  
63 in many different species of pufferfish [12]. The soluble protein saxiphilin has been proposed as  
64 a toxin sponge for STX in various species of amphibians [13], although it remains unclear whether  
65 these species come into contact with STX in nature and whether saxiphilin may act as the  
66 predominant STX transporter in the plasma of frogs. While these insights have advanced our  
67 understanding of toxin physiology, studies in vertebrates have been narrowly focused on a few  
68 potent alkaloids with high-specificity binding proteins. However, other animals carry a wide  
69 diversity of alkaloids for chemical defense and the physiological mechanisms that allow  
70 accumulation of structurally diverse alkaloids are unknown.

71 Some species of frogs sequester a remarkable diversity of dietary alkaloids onto their skin  
72 as a chemical defense. This trait has independently evolved in several frog families, including  
73 Dendrobatidae in Central and South American and Mantellidae in Madagascar. Over 500  
74 compounds have been found on the skin of *Dendrobatidae* frogs, with some alkaloids sourced  
75 from ants, mites, millipedes and beetles [14–16]. Within dendrobatids, alkaloid-based chemical  
76 defenses have evolved independently at least three times [17,18], where non-toxic species do  
77 not uptake alkaloids onto their skin even when they are present in their diet [19–22]. Well-studied  
78 poison frog alkaloids include pumiliotoxins (PTX) whose documented targets include sodium and

79 potassium gated ion channels [23,24] and decahydroquinolines (DHQ) which affect nicotinic  
80 acetylcholine receptors [25]. Epibatidine was first identified in the genus *Epipedobates* and has  
81 also been found to specifically bind certain nicotinic receptors, leading it to be proposed as a  
82 therapeutic analgesic alternative to morphine [26]. Although there is limited research into the  
83 mechanisms of sequestration and autoresistance of alkaloids in poison frogs [13,27–30], it is likely  
84 this process involves alkaloid transport through circulation for these dietary compounds to end up  
85 in skin storage glands. In this study, we tested the hypothesis that poison frogs have an alkaloid-  
86 binding protein in the plasma and aimed to uncover its functional role and evolutionary  
87 significance. We predicted this protein would bind a range of poison frog alkaloids and would be  
88 present in frogs that are chemically defended in nature, but not in undefended species.

89

## 90 **2. RESULTS**

### 91 **An alkaloid-like photoprobe identifies a binding protein in poison frog plasma**

92 We used a biochemical strategy to directly test for alkaloid binding in the plasma of  
93 different species of poison frogs. To do this, we obtained a UV crosslinking probe with an  
94 indolizidine functional group that shares structural similarity to the poison frog alkaloid pumiliotoxin  
95 **251D** (PTX) (Figure 1A, functional group highlighted in blue). Upon UV irradiation, the diazirine  
96 (green) enables protein crosslinking and the subsequent probe-protein complex can be  
97 conjugated to a fluorophore for gel-based visual analysis or biotin for streptavidin enrichment.  
98 Application of this photocrosslinking approach outside of mammalian systems has been  
99 remarkably limited, and in frogs has been limited to studying neuromuscular receptors [31,32].  
100 We found the PTX-like photoprobe shows binding activity within the plasma of three species of  
101 dendrobatid poison frogs, *Oophaga sylvatica*, *Dendrobates tinctorius*, and *Epipedobates tricolor*  
102 (Figure 1B). In these species, this binding activity was largely restricted to a few bands in the 50-  
103 60 kDa range, and was a similar size across different species. Plasma from a non-toxic  
104 dendrobatid poison frog (*Allobates femoralis*), a mantellid poison frog (*Mantella aurantiaca*), the  
105 cane toad (*Rhinella marina*), and humans showed no binding activity with the photoprobe (Figure  
106 1B). We further tested whether the presence of alkaloids would compete off photoprobe binding.  
107 In *O. sylvatica*, photoprobe binding resulted in two bands that showed competition by the addition  
108 of PTX, decahydroquinoline (DHQ), or epibatidine (epi), but not with nicotine (Figure 1C). In *D.*  
109 *tinctorius*, the photoprobe showed a two-band binding pattern, where the bottom band was  
110 competed by PTX and there was slight competition of both bands with DHQ and epibatidine, but  
111 no competition with nicotine (Figure 1D). In both *O. sylvatica* and *D. tinctorius*, competition  
112 occurred when PTX was 10-fold higher in concentration than the photoprobe (Figure S1A,C). In  
113 *E. tricolor* plasma from some individuals two bands were observed while in others only one band  
114 was seen, and these were more faint in the presence of DHQ or epibatidine but not PTX or  
115 nicotine (Figure 1E). We conclude from these photocrosslinking experiments that plasma binding  
116 of alkaloids in three species of chemically defended dendrobatid poison frogs is mediated by a  
117 ~50-60 kDa plasma protein.

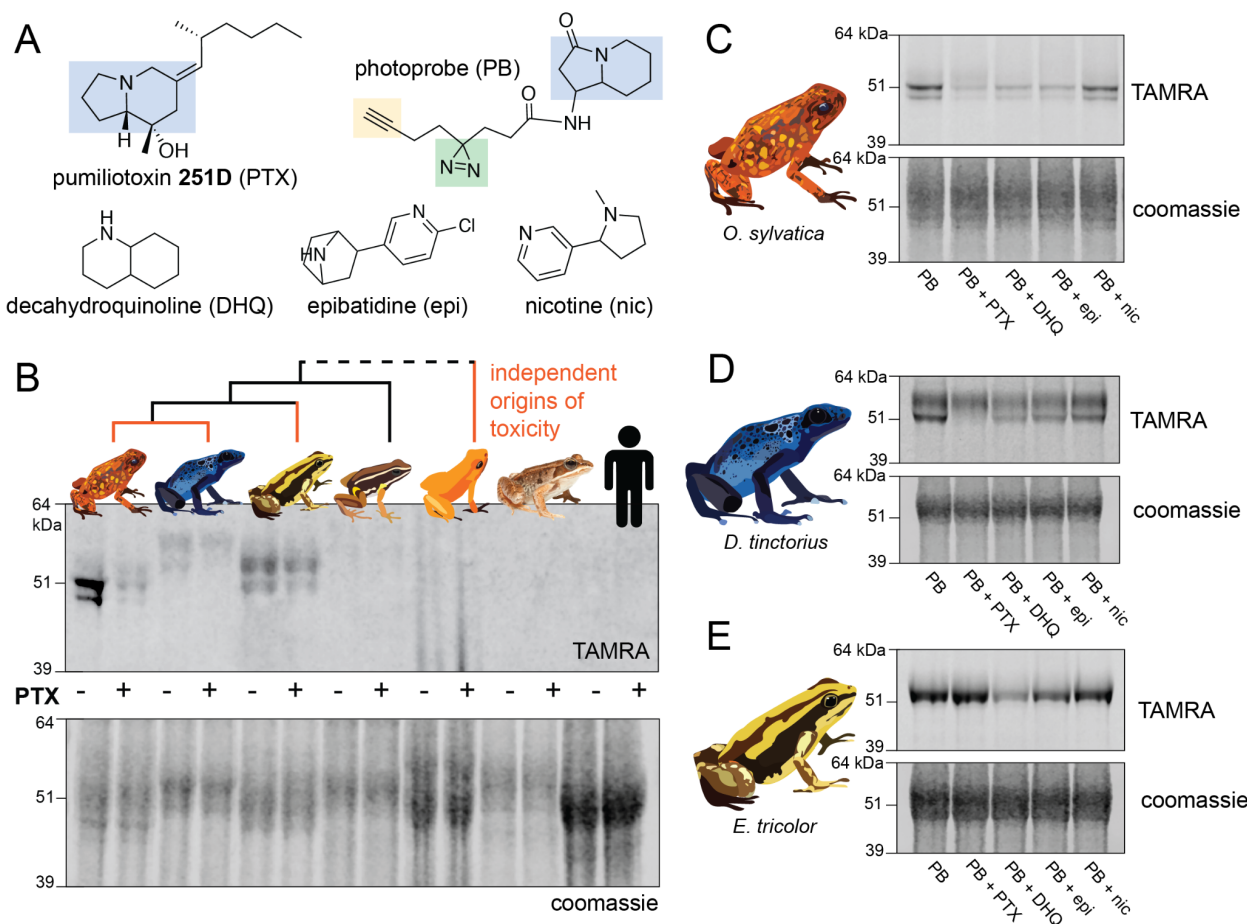

118  
 119 **Figure 1: Alkaloid-like photocrosslinking probes show binding and competition in poison frog plasma.** (A)  
 120 Structures of alkaloid-like photocrosslinking probe and alkaloids tested, with the functional group in blue, the diazine  
 121 group in green, and the terminal alkyne in yellow. (B) Plasma from different species (*Oophaga sylvatica*, *Dendrobates*  
 122 *tinctorius*, *Epipedobates tricolor*, *Allobates femoralis*, *Rhinella marina*, and humans, from left to right) show different  
 123 plasma photoprobe binding activity and competition. Orange lines on phylogeny indicate independent evolutionary  
 124 origins of chemical defense in Dendrobatidae and Mantellidae. (C) *Oophaga sylvatica* plasma shows crosslinking, and  
 125 competition with pumiliotoxin (PTX), decahydroquinoline (DHQ), and epibatidine (epi), but not nicotine (nic). (D)  
 126 *Dendrobates tinctorius* plasma shows crosslinking, and competition with PTX, but not DHQ, epi, or nic. (E)  
 127 *Epipedobates tricolor* plasma shows crosslinking, and competition with DHQ and slightly with epi, but not PTX or nic.

128  
 129 **Proteomic analysis identifies an alkaloid-binding globulin**

130 To identify the alkaloid-binding protein found in the plasma assays, we performed a pull-  
 131 down paired with gel-punch proteomics on three conditions: no photoprobe (negative control),  
 132 photoprobe only (positive control), and photoprobe with PTX competitor (Figure 2A). A biotin  
 133 handle, instead of the fluorophore used above, was chemically added to the photoprobe for the  
 134 enrichment of proteins using streptavidin beads. We used an untargeted proteomics approach to  
 135 quantify and compare these enriched fractions using a proteome reference created from the *O.*  
 136 *sylvatica* genome. On average, 3876 unique peptides were found per sample, mapping to 433 *O.*  
 137 *sylvatica* proteins (Figure 2B). The most highly abundant protein in the photoprobe condition had  
 138 an average number of peptide spectral counts of 1224.5 and was competed off in the photoprobe  
 139 with PTX condition by 64% (Figure 2B), resembling background levels (Figure 2C). This protein  
 140 is annotated as serine protease inhibitor A1 (serpin-A1), which encodes for the protein alpha-1-



141 antitrypsin (A1AT). As our subsequent experiments demonstrate this protein functions as an  
142 alkaloid binding and sequestration protein, we refer to it hereafter as “alkaloid-binding globulin”  
143 (ABG). Mapping the 72 unique peptides onto the protein sequence of ABG showed full coverage  
144 across the protein, excluding the signal peptide, which in other serpins is cleaved during secretion  
145 (Figure S1D). We conclude that ABG functions as a major alkaloid binding protein in poison frog  
146 plasma.  
147

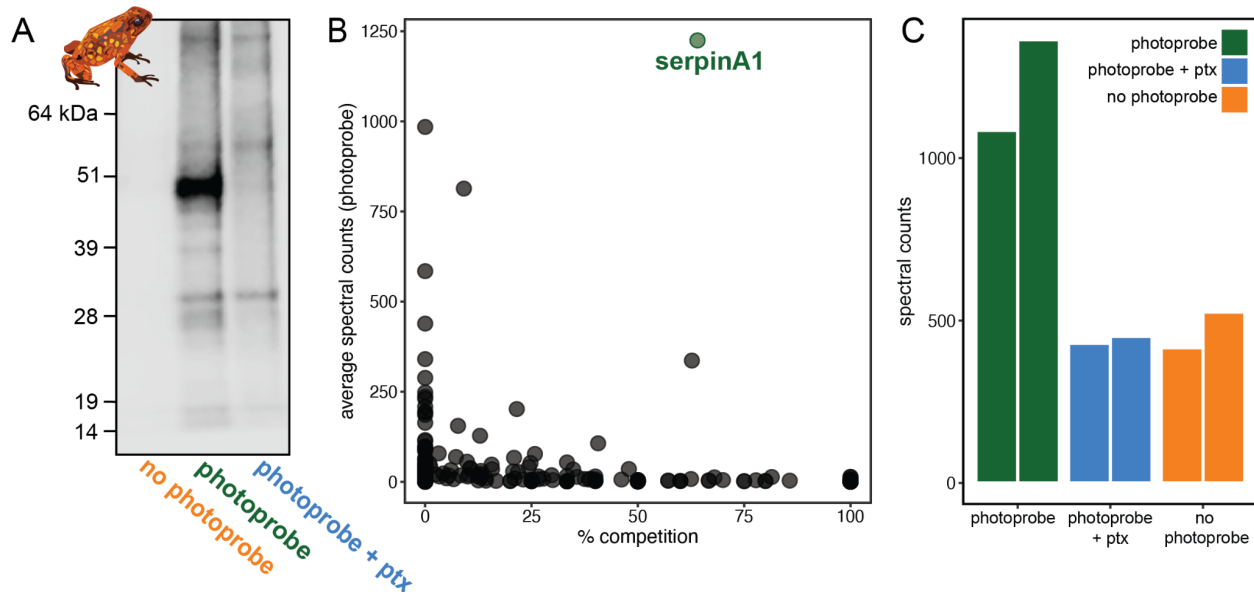

148  
149 **Figure 2: Proteomics identifies serpinA1 as the main pumiliotoxin binding protein in *Oophaga sylvatica***  
150 **plasma. (A)** Streptavidin blot of the proteins pulled down from *O. sylvatica* plasma across the three conditions: no  
151 photoprobe, photoprobe, and photoprobe plus competitor pumiliotoxin (PTX). **(B)** Quantitative proteomics output in  
152 terms of percent competition defined as 100% - average spectral counts in the photoprobe + ptx condition divided by  
153 average spectral counts in the photoprobe only condition. Average was taken across two replicates. **(C)** The number  
154 of spectral counts across conditions for the serpinA1 protein, each replicate is shown individually.  
155

### 156 **Structural predictions of ABG show binding pocket similarities to mammalian hormone** 157 **carriers**

158 The identification of ABG as the principal alkaloid binding protein in plasma was  
159 unexpected as plasma binding of small molecules is commonly mediated by albumin.  
160 Nevertheless, in mammals, members of the serpinA family function as carriers of lipophilic  
161 hormones, providing plausibility to the hypothesis that frog serpin family members may also bind  
162 small molecules. Therefore, we sought further structural insights into ABG using protein structure  
163 predictions and molecular docking simulations to examine if this protein has a predicted binding  
164 pocket for small molecules. Using AlphaFold to predict the structure of the full protein sequence  
165 without the signal peptide resulted in a high confidence structure (Figure 3A). We then compared  
166 it to the structures of serpinA6/corticosteroid-binding globulin (CBG, Figure 3B), biliverdin-binding  
167 serpin (BBS, Figure 3C), serpinA1/alpha-1-antitrypsin (A1AT, Figure S2A), and  
168 serpinA7/thyroxine binding globulin (TBG, Figure S2B). The AlphaFold prediction for *O. sylvatica*  
169 ABG (*OsABG*) demonstrated a conserved structural element of three alpha helices backed by a  
170 set of beta sheets, which is the small molecule binding pocket in CBG, BBS, and TBG (black  
171 boxes, Figure 3A-C, Figure S2B), and also exists in the non-small molecule binding A1AT (black

172 box, Figure S2A). When a molecular docking simulation was run with the whole OsABG protein  
173 as the search space and PTX as the ligand, the highest affinity binding site was in the same  
174 binding pocket defined by this structural motif (Figure 3D). Although the overall structural  
175 components of the binding pockets show similarities across OsABG, CBG, BBS, and TBG, the  
176 individual amino acids coordinating the small molecule binding differ across proteins (Figure 3D-  
177 F, Figure S2D-E). These results offer a structural explanation for PTX binding by ABG and  
178 highlight the homology between ABG and other small molecule binding globulins.

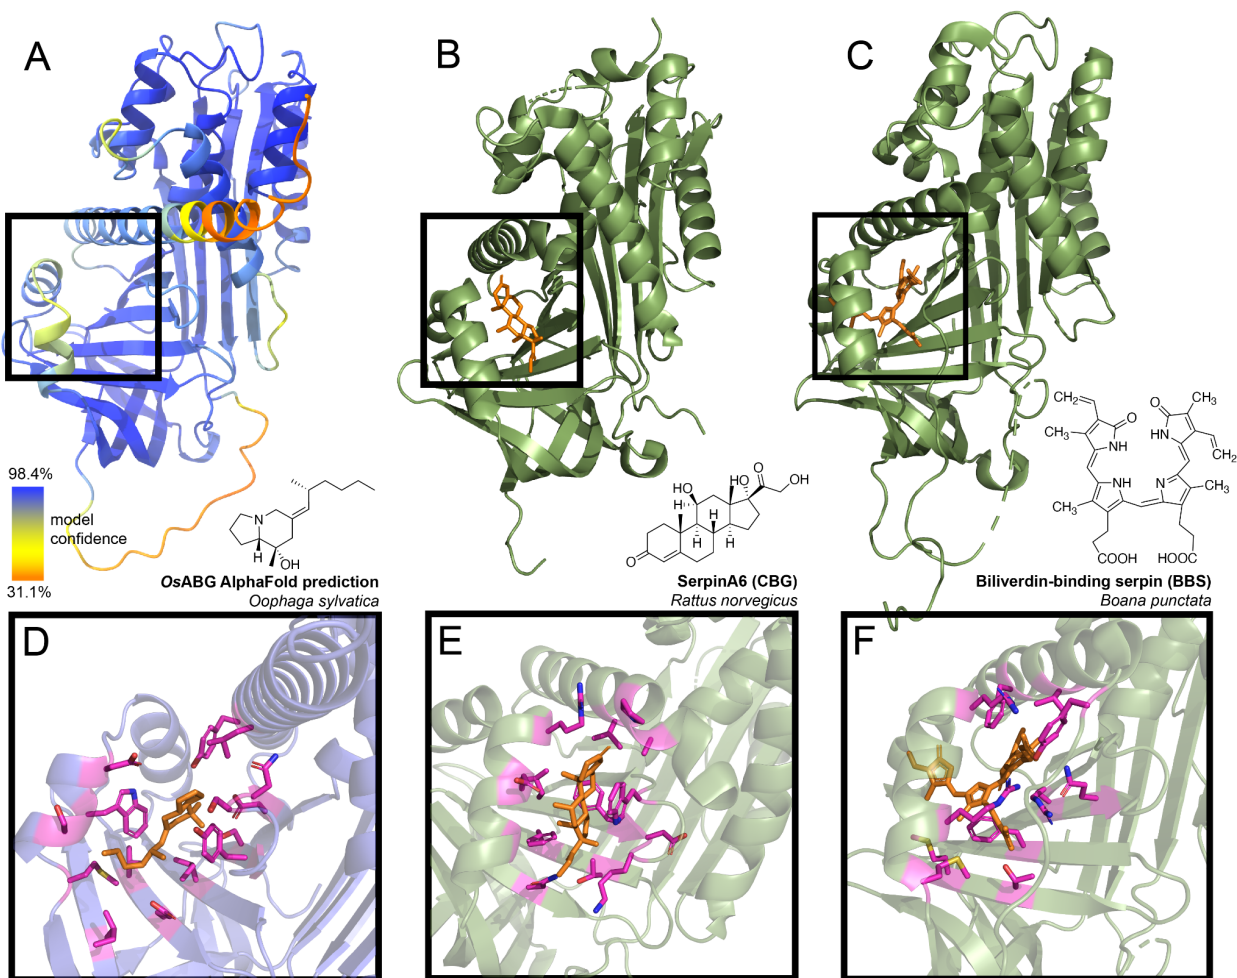

179  
180 **Figure 3: Predicted ABG structure and binding pocket resembles that of other small molecule binding serpins.**  
181 (A) AlphaFold structure predicted with the protein sequence of the *Oophaga sylvatica* ABG, with color representing  
182 model confidence and predicted binding pocket based on molecular docking simulation indicated with a black box. (B)  
183 Crystal structure for rat SerpinA6/corticosteroid-binding globulin, with the cortisol molecule shown in orange (PDB#  
184 2V95). (C) Crystal structure for tree frog *Boana punctata* biliverdin-binding serpin (BBS), with biliverdin shown in orange  
185 (PDB# 7RBW). (D) Close-up of predicted binding pocket of PTX in *O. sylvatica* ABG, with residues proximal to PTX  
186 highlighted in magenta. The structure of PTX is indicated on the top right. (E) Close-up of cortisol binding in CBG (PDB#  
187 2V95), with proximal residues highlighted in magenta. Cortisol structure is displayed on the top right. (F) Close-up of  
188 biliverdin binding in BBS (PDB# 7RBW), with some proximal residues highlighted in magenta. Biliverdin structure is  
189 shown on the top right.

### 191 Recombinant expression recapitulates binding activity of different ABG proteins

192 To confirm ABG binding activity *in vitro* and compare across different species, we  
193 recombinantly expressed and purified *O. sylvatica* ABG (OsABG), and its closest homolog from

194 the *D. tinctorius* and *E. tricolor* transcriptomes (*DtABG* and *EtABG*, respectively). The resulting  
195 purified protein doublet (Figure S4B) is likely due to differences in post-translational glycosylation,  
196 as *OsABG* has two predicted N-glycosylation sites [33]. As expected, purified *OsABG*  
197 recapitulated the binding and competition seen with the plasma, where the photoprobe was most  
198 fully competed by the presence of PTX, and also competed off by DHQ and epibatidine, but not  
199 nicotine (Figure 4A). The competition activity with the purified protein was noticeable at a ratio of  
200 one to one photoprobe to PTX (Figure S1B). Purified *DtABG* and *EtABG* required higher  
201 concentrations of protein to see a signal and showed much weaker photoprobe binding, which  
202 was competed off by the presence of PTX and DHQ in the case of *DtABG* (Figure 4B), and DHQ  
203 and epibatidine in the case of *EtABG* (Figure 4C). Together these results confirm the plasma  
204 findings that ABG is a multi-alkaloid binding protein with different specificities and affinities across  
205 poison frog species, and that *OsABG* alone is sufficient to recapitulate the crosslinking activity  
206 observed in the plasma.

207         Given the predicted binding pocket from the molecular docking simulations, and the  
208 differences in binding activity of the ABG proteins in different poison frog species, we used a  
209 sequence (Figure 4D) and predicted structure (Figure 4E) informed approach to mutate residues  
210 that might coordinate alkaloid binding in the hypothesized pocket. Using the molecular docking  
211 simulation, we identified 6 residues with proximity to the docked PTX molecule that might have  
212 important binding activity: Y36, S268, D273, W276, S374, D383 (Figure 4E). Mutating different  
213 sets of these binding residues in the *OsABG* sequence led to a disruption of binding and  
214 competition. The combined mutations of Y36A, W276A, S374A, D383A and Y36A, S268A,  
215 D273A, D383A disrupted binding to the photoprobe completely (Figure 4E). The single point  
216 mutation of D383A weakened photoprobe binding significantly, to the point of being nearly  
217 undetectable (Figure 4E). These results demonstrate that mutating residues in the binding pocket  
218 identified through molecular docking disrupts binding activity of *OsABG*, providing biochemical  
219 evidence that the structurally predicted binding pocket of ABG indeed is the relevant binding site  
220 for PTX. Furthermore, we have identified a set of residues that are necessary for PTX binding  
221 with high affinity, showing that the plasma binding activity is coordinated by specific amino acids  
222 in *OsABG*.  
223

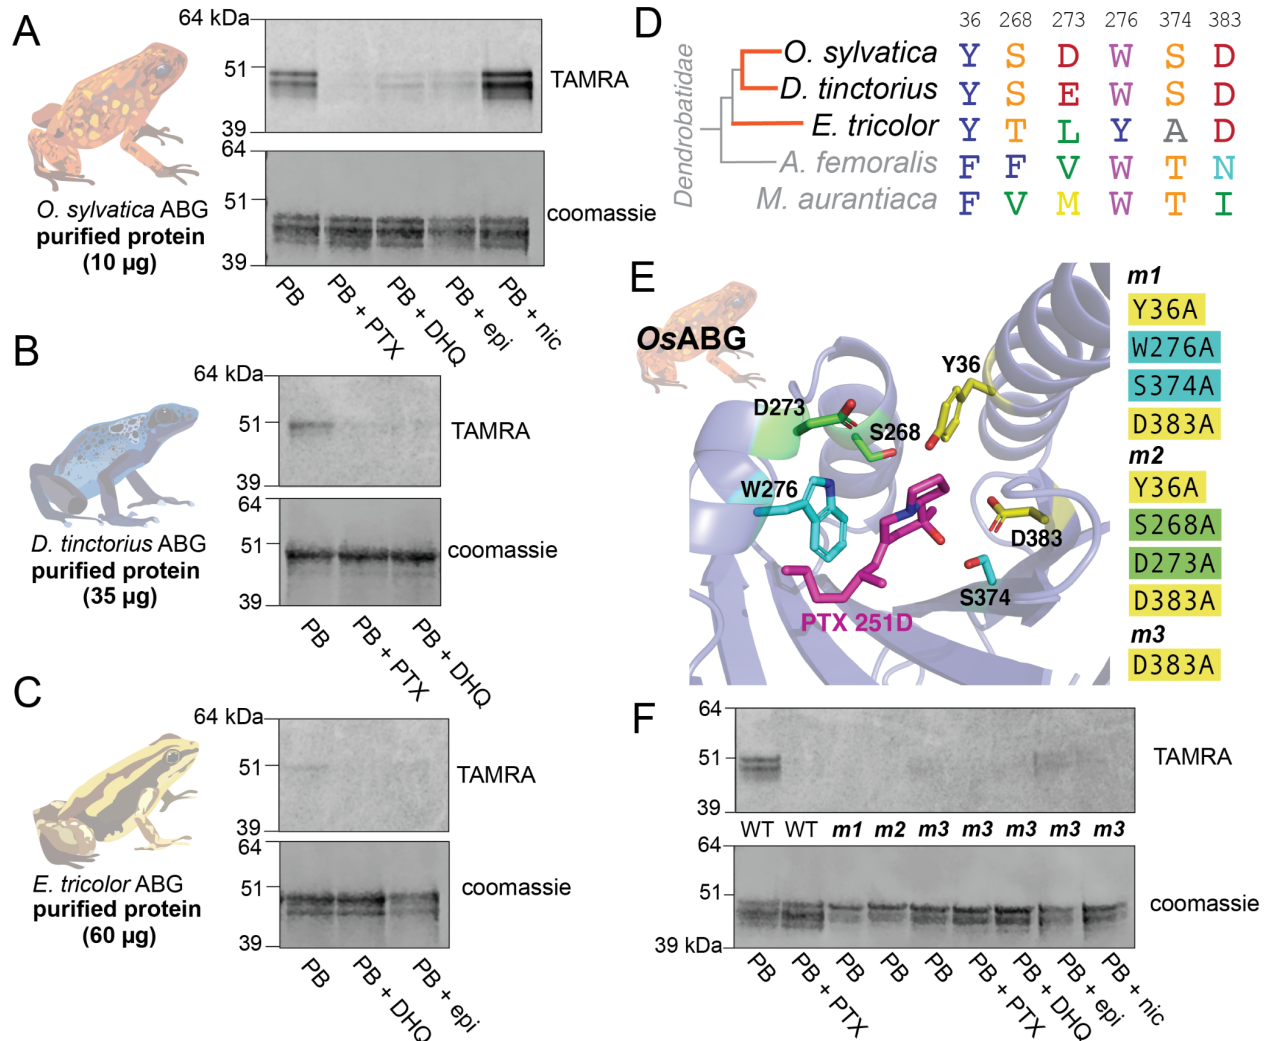

224  
225  
226 **Figure 4: Recombinant expression and binding pocket mutants confirm plasma binding activity and binding**  
227 **pocket predictions.** (A) Photoprobe crosslinking and competition with different compounds of 10 µg recombinantly  
228 expressed and purified OsABG recapitulates the binding activity seen in the plasma (Figure 1C). (B) Photoprobe  
229 crosslinking with 35 µg recombinantly expressed *Dendrobates tinctorius* ABG shows crosslinking, and competition with  
230 PTX and DHQ. (C) Photoprobe crosslinking with 60 µg recombinantly expressed *Epipedobates tricolor* ABG shows  
231 crosslinking, and competition with DHQ and epibatidine. (D) Alignment of protein sequence of proteins homologous to  
232 OsABG across species shows conservation of certain amino acids. Coloring of amino acids is based on the RasMol  
233 “amino” coloring scheme, which highlights amino acid properties. (E) Potential binding residues were identified from  
234 the molecular docking simulation. Three different mutants were made based on specific amino acids in the binding  
235 pocket, with either a combination of four different alanine substitutions (m1 - yellow and teal residues, and m2 - yellow  
236 and green residues) or a single alanine substitution at D383 (m3). PTX is shown in magenta. Oxygen atoms on the  
237 molecules are highlighted in red, nitrogen in blue. (F) Binding pocket mutants lose binding activity of the photoprobe in  
238 the original reaction conditions.

### 239 OsABG sequesters free PTX in solution with high affinity

240 Previous work has described the binding affinities of small molecule binding serpins and  
241 their important role in regulating the pool of free versus bound ligands in circulation [34–37]. We  
242 hypothesized that OsABG might play a similar role for alkaloids in the poison frog plasma. To test  
243 this, we examined both the binding affinity of OsABG for PTX and its ability to regulate the pool



244 of bioavailable alkaloids in solution. Using microscale thermophoresis (MST) we found a  
245 dissociation constant ( $K_D$ ) of 1.58  $\mu$ M (Figure 5A). To test the ability of OsABG to sequester  
246 alkaloids *in vitro*, we used a 3 kDa molecular weight cutoff centrifuge filter to separate the “bound”  
247 and “free” PTX (Figure 5B), which we then quantified by liquid chromatography-mass  
248 spectrometry. We found that in the presence of OsABG, the amount of “free” PTX is dramatically  
249 reduced, while that of nicotine is not (Figure 5C). These results show that OsABG is able to bind  
250 PTX in solution with high affinity, and therefore may regulate the amount of free PTX in solution.  
251 This regulation of bioavailable pools of PTX in circulation may have downstream consequences  
252 on sequestration, transcription, and signaling throughout the organism.

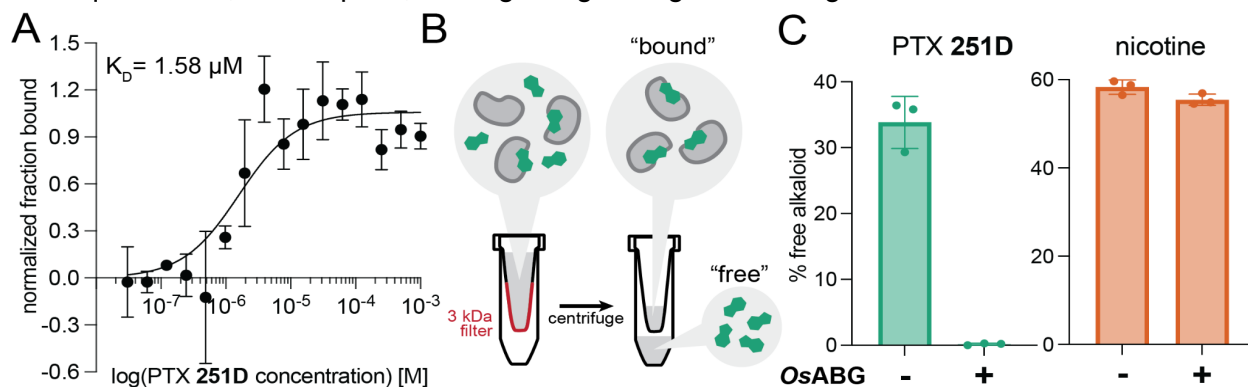

253 **Figure 5: OsABG sequesters free PTX in solution (A)** Microscale thermophoresis (MST) of labeled OsABG with  
254 PTX finds a dissociation constant ( $K_D$ ) of 1.58  $\mu$ M. **(B)** A 3 kDa molecular weight cut off (MWCO) centrifuge filter was  
255 used to separate “free” versus “bound” alkaloids in solutions with and without OsABG present, to later be quantified  
256 with LC-MS. **(C)** The percent of “free” PTX 251D (green) dropped when OsABG was present, however the amount of  
257 “free” nicotine” remained unchanged by the presence of OsABG.  
258  
259

## 260 OsABG is highly expressed in wild frogs and binds ecological toxins

261 We next sought to better understand the functional role of OsABG in a context relevant to  
262 the ecology and physiology of poison frogs. *Oophaga sylvatica* frogs were collected across three  
263 different locations in Ecuador (Figure 6A). Tissue RNA sequencing revealed that OsABG mRNA  
264 is expressed very highly in the liver compared to other tissues (Figure 6B). However a reanalysis  
265 of previously published proteomics data shows that OsABG is detectable in the liver, skin, and  
266 gut, consistent with movement through the plasma (Figure 6C). Hierarchical clustering of all  
267 unique serpinA genes in the genome shows that OsABG is most closely related to two other  
268 serpinA1 genes, Os4677 and Os4682 (Figure 6D). The liver expression of OsABG is higher than  
269 all other serpinA genes, and is higher than the expression of albumin in the liver (Figure 6D).  
270 Field-collected *O. sylvatica* frog skin contains alkaloids from many different classes, with 33% of  
271 the summed alkaloid load being histrionicotoxins, followed by 22% in 5,8-indolizidines, 15% in  
272 3,5-indolizidines, 13% in 5,6,8-indolizidines, and 10% in decahydroquinolines (Figure 6E). Further  
273 crosslinking experiments with purified OsABG found that it also binds a histrionicotoxin-like base  
274 ring structure (HTX), indolizidine (indol), and shows slight competition by a toxin mixture created  
275 from wild frog skin extracts (Figure 6F). Together, these data characterize the expression profile  
276 and distribution of OsABG and show that it is capable of binding other alkaloid classes that are  
277 found in wild frogs.  
278

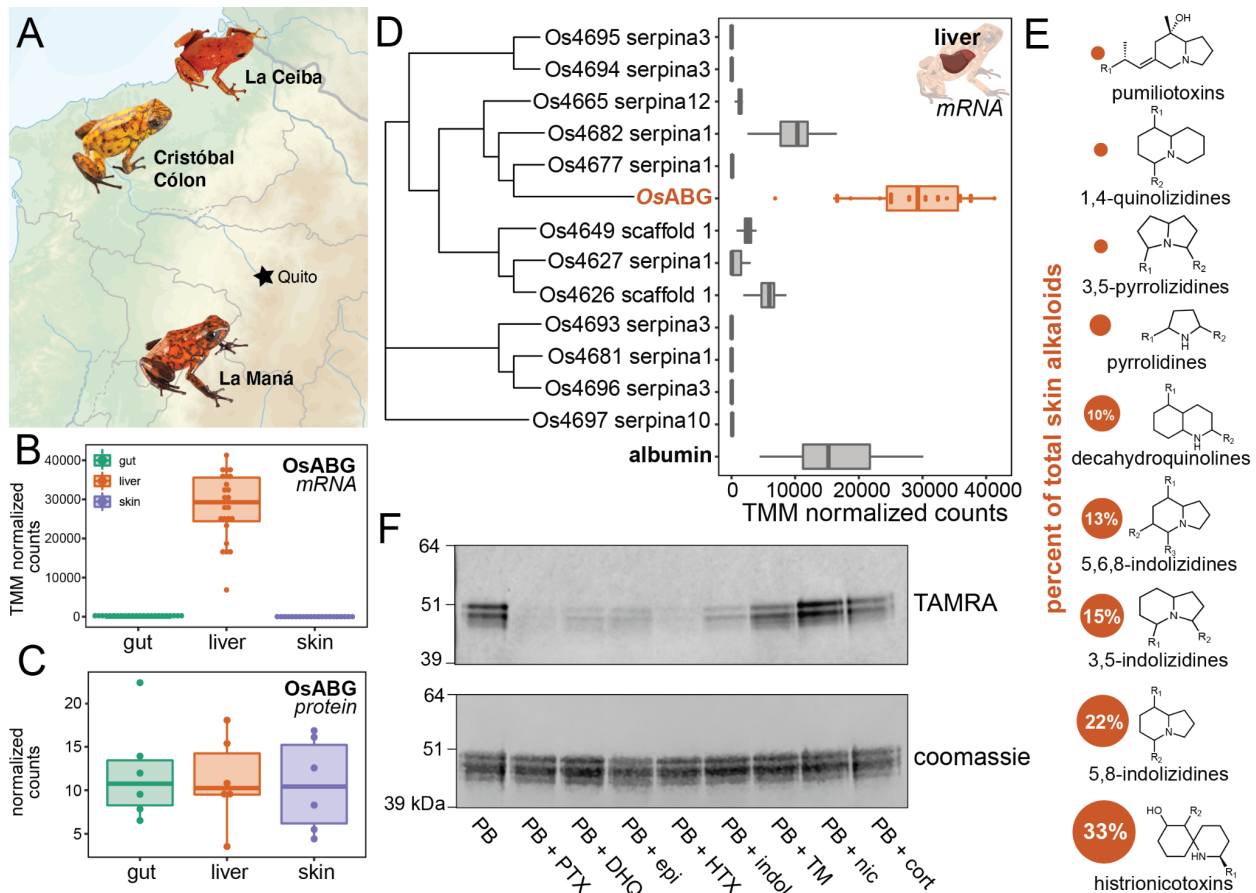

279  
280  
281  
282  
283  
284  
285  
286  
287  
288  
289

**Figure 6: OsABG is expressed in the liver and binds ecologically relevant alkaloids** (A) Wild *Oophaga sylvatica* were collected across three locations in Ecuador, n=10 per location. (B) Comparison of mRNA expression levels across tissues found high expression in the liver, and low to no expression in the skin and gut. (C) Reanalysis of proteomics from Caty et al., 2022 found that OsABG protein is present in the gut, liver, and skin. (D) The liver expression level of OsABG was higher than that of other members of the serpinA family found in the genome, and of albumin. (E) Dorsal skin alkaloids fell into 9 different classes, with the size of the circle representing the averaged percent of total skin alkaloid load. (F) Photoprobe binding was competed by PTX, DHQ, epi, a histrionicotoxin-like compound (HTX), and indolizidine ring without R groups (indol), and slightly by a mixture of skin toxins from the wild specimens (TM). Photoprobe binding was not competed by nicotine or cortisol (cort).

### 290 3. DISCUSSION

291 Alkaloid-binding globulin (ABG) represents a new small molecule binding functionality for  
292 a member of the serpin family, with a structurally conserved binding pocket similar to mammalian  
293 hormone carriers and biliverdin-binding serpin. Most serpin proteins are known for the anti-  
294 protease inhibitory activity, however there are members of the serpin superfamily that have been  
295 instead characterized as non-inhibitory small molecule binding globulins. In tree frogs, biliverdin-  
296 binding serpin (BBS) has been identified as the primary protein that binds biliverdin [38], the heme  
297 metabolite that is responsible for green coloration in the lineage, although it remains unclear  
298 whether BBS is also responsible for the transport of biliverdin across tissues. In mammals,  
299 cortisol-binding globulin (CBG, serpinA6) and thyroxine-binding globulin (TBG, serpinA7) play  
300 important roles in the transport and regulation of plasma hormone concentrations [39,40]. BBS,  
301 CBG, and TBG all bind their respective ligands in a similar structural pocket [41], however the  
302 identity of the residues that coordinate binding vary across the proteins. Mutations of key binding

303 site residues in OsABG were able to disrupt binding, confirming the binding pocket predictions  
304 and the functional homology to BBS, CBG, and TBG. A more detailed mutational scanning would  
305 be necessary to fully understand which binding pocket residues coordinate the binding of different  
306 alkaloids. It would be interesting to expand binding experiments to more classes of alkaloids,  
307 although we are limited by the commercial availability of many of these compounds. The  
308 similarities between ABG and mammalian hormone carriers raises the possibility that alkaloids  
309 may also act as signaling molecules, which would require further characterization of other alkaloid  
310 targets in poison frogs and more mechanistic information about ABG alkaloid transport. The data  
311 presented suggest that OsABG is using the binding site already present in serpin family proteins,  
312 and has encoded remarkable specificity for certain alkaloids within this site.

313 We found a novel Alkaloid Binding Globulin (ABG) in poison frog plasma, with binding  
314 specificity that differs across species and independent evolutionary origins of acquired chemical  
315 defense. Of the species tested, the photoprobe showed binding activity only in dendrobatid  
316 species that can acquire alkaloid chemical defenses from their diet, namely *O. sylvatica*, *D.*  
317 *tinctorius*, and *E. tricolor*, which represent two independent origins of chemical defense within the  
318 poison frog lineage [17]. This suggests that ABG has evolved in dendrobatid frogs that are  
319 capable of acquired chemical defense, as binding was not seen in the dendrobatid without  
320 chemical defenses in nature (*A. femoralis*), the Malagasy poison frog (*M. aurantiaca*), cane toads,  
321 or human plasma. Malagasy poison frogs represent a convergent evolution of many of the notable  
322 phenotypes in the dendrobatid lineage, and have been found to contain pumiliotoxins and other  
323 dendrobatid alkaloids [42–44]. The lack of binding activity in the plasma may indicate that they  
324 have evolved different molecular mechanisms for alkaloid transport and autoresistance. Using  
325 competition of the photoprobe by presence of excess alkaloid as a proxy for binding activity, we  
326 found differences in the competition activity of different alkaloids across species. This different  
327 plasma binding suggests that *O. sylvatica* has a more promiscuous alkaloid binding pocket, which  
328 may be related to the high diversity of alkaloids found in wild *O. sylvatica* frogs [27,45,46]. Future  
329 characterization of plasma binding activity with more species and alkaloid compounds would be  
330 critical to fully trace the evolution of ABG binding across the poison frog lineage. Overall, the  
331 diversity in plasma binding seen across phylogenetically close species may reflect the diversity in  
332 environmental pressures that have led to species-specific adaptations at the molecular scale.

333 OsABG is expressed at high levels and binds additional alkaloids found in high abundance  
334 on the skin of wild *O. sylvatica*. OsABG is produced in the liver as is the case with most members  
335 of the serpin family in humans [47], cows [48], rats [49], baboons [50], and macaques [48]. The  
336 liver expression level of OsABG was much higher than other serpinA proteins and albumin, which  
337 in most vertebrates is the most abundant plasma protein [51–53], further highlighting the  
338 importance of this protein for poison frog physiology. Taken together, this supports a model where  
339 OsABG is produced in the liver, binds alkaloids present in the blood or recently absorbed by the  
340 intestines, and then may transport alkaloids to the skin for bioaccumulation. The micromolar  $K_D$   
341 value we identified for OsABG with PTX is higher than the previously reported value for CBG  
342 [34,36], and TBG [54], as well as that reported for the “toxin sponge” protein saxiphilin [55], which  
343 are all in the nanomolar range. The lower affinity of OsABG provides further support to the  
344 hypothesis that OsABG may be acting as a transporter protein to other tissues, and would be in  
345 line with the hypothesis that there may be other mechanisms involved in autoresistance to  
346 circulating alkaloids not bound by protein [56]. It is also possible that OsABG has affinities in the

347 nanomolar range for other ligands which were not tested in this study. Previous work with CBG  
348 and TBG in mammals show that they bind 70-90% of their respective ligands in the plasma, thus  
349 regulating the concentration of free hormone in the blood [40,57]. Furthermore, CBG and TBG  
350 have transport activity, as the release of the ligand is induced by proteolytic cleavage of the  
351 reactive center loop which creates a conformational change of the protein [39,58]. ABG may be  
352 acting in a similar way to mediate the bioaccumulation of dietary alkaloids onto the skin. The  
353 reduction of “free” PTX when OsABG is present *in vitro* further supports this, given that OsABG  
354 would be regulating the pool of unbound alkaloids available in the plasma. Further  
355 characterization using the respective protease from *O. sylvatica* would be necessary to validate  
356 the alkaloid release through proteolytic cleavage of the reactive center loop as well as genetic  
357 knockout frogs to fully characterize the organismal role of OsABG.

358

### 359 **Summary**

360 This study presents the first evidence of an alkaloid binding protein in the poison frog plasma with  
361 a suggested role as a transporter molecule. We found a novel alkaloid binding function for a  
362 member of the serpin family, contributing to a mounting body of evidence suggesting that the  
363 small molecule binding activity of certain serpins has evolved multiple times from their protease  
364 inhibitor precursors with a structurally conserved binding pocket. Our alkaloid comparisons with  
365 OsABG show that this serpin binding pocket has been fine-tuned to have specificity for certain  
366 small molecule substrates, and may play an important ecological and physiological role in the  
367 evolution of chemical defense in poison frogs as well as future protein engineering efforts.

368

## 369 **4. MATERIALS AND METHODS**

### 370 **Animal usage**

371 All animal procedures were approved by the Institutional Animal Care and Use Committee  
372 at Stanford (protocol #34153). Topical benzocaine was used for anesthesia prior to the  
373 euthanasia of all animals. Laboratory-bred animals were purchased from Understory Enterprises  
374 (Ontario, Canada) or Josh’s Frogs (Michigan, USA) depending on the species. Animals were  
375 either euthanized for plasma collection upon arrival, or housed in 18<sup>3</sup> inch glass terraria, and fed  
376 a diet of non-toxic *Drosophila melanogaster* until euthanasia. Plasma and tissues from a total of  
377 62 animals were used for this study, consisting of 32 lab-bred animals and 30 field-collected  
378 animals that are described below.

379

### 380 **Plasma collections**

381 Lab-bred, and therefore non-toxic, poison frogs were anesthetized with topical application  
382 of 10% benzocaine on the ventral skin, and euthanized with cervical translocation. Blood was  
383 collected directly from the cervical cut using a heparinized capillary tube (22-362-566, Fisher  
384 Scientific, Waltham, MA) and deposited into a lithium heparin coated microvette tube  
385 (20.1282.100, Sarstedt, Nümbrecht, Germany). Blood was spun down 10 minutes at 5000 rpm at  
386 4°C on a benchtop centrifuge, and the top layer which contains the plasma was removed and  
387 pipetted into a microcentrifuge tube. This was stored at -80°C until it was used for experiments.

388



## 389 **UV crosslinking and competition using alkaloid-like photoprobe**

390 Photocrosslinking methods follow methods outlined in Kim *et al.*, 2020 [59]. Plasma or  
391 purified protein was thawed on ice. The total reaction volume was 50  $\mu$ L and all experiments were  
392 performed in a clear 96 well plate. For plasma, 5  $\mu$ L of undiluted plasma was mixed with 40  $\mu$ L of  
393 PBS for each reaction. For purified *O. sylvatica* protein, 10  $\mu$ g of protein was diluted into PBS per  
394 reaction to a volume of 45  $\mu$ L. For *E. tricolor* and *D. tinctorius* protein, 60  $\mu$ g and 35  $\mu$ g were used,  
395 respectively; a higher amount of protein was used because no photocrosslinking was detected at  
396 10  $\mu$ g for these proteins. To this, either 2.5  $\mu$ L of DMSO was added as vehicle control, or 2.5  $\mu$ L  
397 of competitor compound dissolved in DMSO was added at a final concentration of 100  $\mu$ M for  
398 plasma competition experiments unless indicated otherwise, or 1 mM for purified protein  
399 experiments unless indicated otherwise. The competitor compounds were: custom synthesized  
400 pumiliotoxin **251D** (PTX, PepTech, Burlington, MA), decahydroquinoline (DHQ, 125741, Sigma-  
401 Aldrich, St. Louis, MO), epibatidine (epi, E1145, Sigma-Aldrich), a histrionicotoxin-like compound  
402 (HTX, ENAH2C55884A-50MG, Sigma-Aldrich), indolizidine (indol, ATE24584802-100MG,  
403 Sigma-Aldrich), nicotine (nic, N3876-100ML, Sigma-Aldrich), cortisol (cort, H0888-1G, Sigma-  
404 Aldrich). The “toxin mixture” (TM) used as a competitor in Figure 6 was made by taking 20 $\mu$ L of  
405 each of the skin alkaloid extracts from wild frogs described below, evaporating it under gentle  
406 nitrogen gas flow, and resuspending in 100 $\mu$ L of DMSO. This was followed by addition of 2.5  $\mu$ L  
407 of photoprobe (Z2866906198, Enamine, Kyiv, Ukraine) dissolved in DMSO on ice, for a final  
408 photoprobe concentration of 5  $\mu$ M in plasma experiments and 100  $\mu$ M in purified protein  
409 experiments. This was incubated on ice for 10 minutes, and then UV crosslinked (Stratalinker UV  
410 1800 Crosslinker, Stratagene, La Jolla, CA) for 5 minutes on ice. TAMRA visualization of  
411 crosslinked proteins was done by adding 3  $\mu$ L TBTA (stock solution: 1.7 mM in 4:1 v/v DMSO:tert-  
412 Butanol; H66485-03, Fisher), 1  $\mu$ L Copper (II) Sulfate (stock solution: 50 mM in water; BP346-500,  
413 Fisher), 1  $\mu$ L Tris (2-carboxyethyl) phosphine hydrochloride (freshly prepared, stock solution: 50  
414 mM; J60316-06, Fisher), and 1  $\mu$ L TAMRA-N3 (stock solution: 1.25 mM in DMSO; T10182, Fisher),  
415 incubating at room temperature for 1 hour, and quenching the reaction by boiling with 4x SDS  
416 loading buffer. This was run on a Nupage 4-12% Bis-Tris protein gel (NP0323BOX, Invitrogen,  
417 Waltham, MA) and the in-gel fluorescence of the gel was visualized using a LI-COR Odyssey  
418 imaging system (LI-COR Biosciences, Lincoln, Nebraska) at 600 nm for an exposure time of 30  
419 seconds. After imaging the TAMRA signal, the same gel was coomassie stained (InstantBlue,  
420 ISB1L, Abcam, Cambridge, UK) and visualized the same way at 700 nm.

421 For proteomic identification of competed proteins, plasma samples were pooled from five  
422 different individuals and were crosslinked with either no photoprobe and equivalent amounts of  
423 DMSO, 5  $\mu$ M photoprobe and DMSO, or 5  $\mu$ M photoprobe and 100  $\mu$ M PTX as described above.  
424 Each condition was set up as 24 individual reactions and pooled after crosslinking. To attach a  
425 biotin handle, 3  $\mu$ L TBTA, 1  $\mu$ L CuSO<sub>4</sub>, 1  $\mu$ L TCEP, and 1.14  $\mu$ L Biotin-N3 (stock solution: 9.67 mM  
426 in DMSO; 1265, Click Chemistry Tools, Scottsdale, AZ), were added for each reaction and this  
427 was incubated at room temperature for 1 hour, rotating. After incubation, each condition was run  
428 through a 3kDa MWCO centrifuge filter twice (UFC800324, Amicon, Millipore-Sigma, Burlington,  
429 MA) to dilute excess Biotin-N3 until reaching a 900x dilution. Pulldown of biotinylated photoprobe-  
430 protein complexes was achieved with a magnetic bead strep pulldown following the protocol  
431 outlined in Wei *et al.*, 2021[60]. The pre and post-pulldown samples were run on a gel for a  
432 streptavidin blot (Figure 2A) and silver stain. After verifying pulldown efficacy, samples were run

433 on SDS-PAGE gels in two replicates (one lane each) for each condition. Gels were fixed in 50:50  
434 water:MeOH with 10% Acetic Acid for 1-2 hours. For the first replicate, the gel was run for a short  
435 period, and an approximately one centimeter squared portion containing the whole lane for each  
436 condition was excised and fixed. For the second replicate, the gel was run completely and the  
437 proteins between 39 kDa and 64 kDa were excised and fixed using the ladder as a size reference.  
438 Sections were chopped into 1 mm pieces under sterile conditions and stored at 4°C in 100µL of  
439 water with 1% acetic acid until processed for proteomics.

440

#### 441 **Proteomic identification of pulled down proteins across conditions**

442 For proteomics analyses, SDS-PAGE gel slices approximately 1 cm in length were  
443 prepared for proteolytic digestion. Each fixed gel slice was diced into 1 mm cubes under sterile  
444 conditions, and then rinsed with 50 mM ammonium bicarbonate to remove residual acidification  
445 from the fixing process. Following rinsing, the gels were incubated in 80% acetonitrile in water for  
446 five minutes; the solvent was removed and then the gel pieces were incubated with 10 mM DTT  
447 dissolved in water at room temperature for 20 minutes. Following reduction, alkylation was  
448 performed using 30 mM acrylamide for 30 minutes at room temperature to cap free reduced  
449 cysteines. Proteolysis was performed using trypsin/lysC (Promega, Madison, WI) in 50 mM  
450 ammonium bicarbonate overnight at 37°C. Resulting samples were spun to pellet gel fragments  
451 prior to extraction of the peptides present in the supernatant. The resulting peptides were dried  
452 by speed vac before dissolution in a reconstitution buffer (2% acetonitrile with 0.1% formic acid),  
453 with an estimated 1 µg on-column used for subsequent LC-MS/MS analysis.

454 The liquid chromatography mass spectrometry experiment was performed using an  
455 Orbitrap Eclipse Tribrid mass spectrometer RRID:022212 (Thermo Scientific, San Jose, CA) with  
456 liquid chromatography using an Acquity M-Class UPLC (Waters Corporation, Milford, MA). A flow  
457 rate of 300 nL/min was used, where mobile phase A was 0.2% formic acid in water and mobile  
458 phase B was 0.2% formic acid in acetonitrile. Analytical columns were prepared in-house with an  
459 I.D. of 100 microns pulled to a nanospray emitter using a P2000 laser puller (Sutter Instrument,  
460 Novato, CA). The column was packed using C18 repositil Pur 1.8 micron stationary phase (Dr.  
461 Maisch) to an approximate length of 25 cm. Peptides were directly injected onto the analytical  
462 column using a 80 minute gradient (2%–45% B, followed by a high-B wash). The mass  
463 spectrometer was operated in a data dependent fashion using CID fragmentation in the ion trap  
464 for MS/MS spectra generation.

465 For data analysis, the .RAW data files were processed using Byonic v4.1.5 (Protein  
466 Metrics, Cupertino, CA) to identify peptides and infer proteins based on a proteomic reference  
467 created with the *O. sylvatica* genome annotation. Proteolysis with Trypsin/LysC was assumed to  
468 be specific with up to 2 missed proteolytic cleavages. Precursor mass accuracies were held within  
469 12 ppm, and 0.4 Da for MS/MS fragments in the ion trap. Cysteine modified with propionamide  
470 were set as fixed modifications in the search, and other common modifications (e.g. oxidation of  
471 methionine) were also included. Proteins were held to a false discovery rate of 1%, using standard  
472 reverse-decoy technique [61].

473

#### 474 **Identification of ABG proteins in different species and sequence confirmation**

475 To identify potential ABG proteins in other species, we used the OsABG protein sequence  
476 identified in the proteomics as the query and searched against blast databases created from the

477 *Allobates femoralis* genome, and *Epipedobates tricolor*, *Dendrobates tinctorius*, and *Mantella*  
478 *aurantiaca* transcriptomes. The top hit from each blast search was used as the most probable  
479 ABG gene from those species. To ensure that the sequences did not contain sequencing or  
480 alignment errors, the gene from *O. sylvatica*, *D. tinctorius*, and *E. tricolor* was amplified using PCR  
481 and sequence confirmed with sanger sequencing. Total RNA was extracted from flash frozen liver  
482 tissue from three lab-bred, non-toxic, individuals from each species using the Monarch total RNA  
483 Miniprep Kit (T2010S, New England Biolabs, Ipswich, MA) following manufacturer instructions.  
484 This was used to create cDNA using the SuperScript III First-Strand Synthesis kit (18080-400,  
485 Invitrogen), following manufacturer instructions with an oligo(dT)<sub>20</sub> primer. This was used for a  
486 PCR using Phusion High Fidelity DNA polymerase (F-530, Thermo Scientific) and the primers  
487 and cycling conditions described below. PCRs were analyzed using a 1% agarose gel for  
488 presence of a single band, cleaned up (NucleoSpin Gel and PCR cleanup, 740609.50, Takara  
489 Bio, Shiga, Japan), and transformed into pENTR vectors using a D-TOPO kit (45-0218,  
490 Invitrogen). Plasmids containing the ABG sequences from each individual were then mini prepped  
491 (27106X4, Qiagen, Hilden, Germany) and sanger sequenced with M13F and M13R primers  
492 (Azenta Life Sciences, South San Francisco, California). Sequences were aligned using  
493 Benchling (Benchling Inc, San Francisco, California) software, with MAFFT used for DNA  
494 alignments and Clustal Omega used for protein alignments.  
495

| species              | fwd primer                              | rev primer                                 | Tm   |
|----------------------|-----------------------------------------|--------------------------------------------|------|
| <i>O. sylvatica</i>  | CACCATGAACTTTTCGTCTA<br>CCTGTGTTTCAGC   | CTATTTTGTGGGTCTACTATTC<br>TTCCGCTG         | 68°C |
| <i>D. tinctorius</i> | CACCATGAAGCTTTTCGTCTT<br>CCTATGTTTCAGCC | CTATTTTGTGGGTTTATTATTTT<br>TCCATTCAAATATCG | 66°C |
| <i>E. tricolor</i>   | CACCATGAAGCTTTTCATCTT<br>CCTGTGTTTGAGCC | CTATTTTGTGGGTCTATTATTCT<br>TCCGAGAAAAC     | 68°C |

496 Cycling conditions: 98°C for 30 seconds, [98°C for 10 seconds, T<sub>m</sub> for 30 seconds, 72°C for 2  
497 minutes] x 34 cycles, 72°C for 10 minutes  
498

### 499 Protein structure prediction and molecular docking analyses

500 The OsABG protein folding was predicted using the amino acid sequence, edited for point  
501 mutations found across all three individuals used for sequence verification, and the AlphaFold  
502 google colab notebook  
503 ([https://colab.research.google.com/github/deepmind/alphafold/blob/main/notebooks/AlphaFold.i](https://colab.research.google.com/github/deepmind/alphafold/blob/main/notebooks/AlphaFold.ipynb)  
504 [pynb](https://colab.research.google.com/github/deepmind/alphafold/blob/main/notebooks/AlphaFold.ipynb))[62]. The predicted structure is provided in the supplementary information. The default  
505 AlphaFold parameters were used. Molecular docking was performed using the UCSF Chimera  
506 software (<https://www.cgl.ucsf.edu/chimera/>)[63], using AutoDock Vina [64,65] with the three  
507 dimensional structure of PTX **251D** (Pubchem CID 6440480). The whole protein was used as the  
508 search space with the default search parameters (5 binding modes, exhaustiveness of search of  
509 8, and a maximum energy difference of 3 kcal/mol). The docking result with the highest predicted  
510 affinity was used and is included in the supplementary files. Protein structures and docking were  
511 visualized using PyMol for publication quality images.

512

### 513 **Recombinant protein expression and binding assays**

514 Recombinant ABG proteins were expressed by Kemp Proteins (Maryland, USA) through  
515 their custom insect cell protein expression and purification services. The reagents and vectors  
516 used are proprietary to Kemp Proteins, however the general expression and purification details  
517 are as follows. The verified protein sequences described above or the point mutations (Figure 4)  
518 were codon-optimized for SF9 insect expression, and a 10xHIS tag was added to the C-terminal  
519 end. For OsABG, a 1 L expression was performed, for all other sequences (other species and  
520 mutants) a 50 mL expression was used. For the 1 L expression, a multiplicity of infection of one  
521 was used for the p1 baculovirus and the supernatant was collected after 72 hours. To this, 5 mL  
522 of Qiagen Ni-NTA resin washed and equilibrated in Buffer A (20 mM Sodium Phosphate, 300 mM  
523 NaCl, pH=7.8) was added and it was mixed overnight at 4°C. Afterwards, it was packed in a 5 mL  
524 Bio-Scale column and washed with 3 column volumes (CV) of Buffer A, followed by washing with  
525 5% Buffer B (20 mM Sodium Phosphate, 300 mM NaCl, 500 mM Imidazole, pH=7.8) for 5 CV.  
526 Protein was eluted with a linear gradient from 5-60% over 25 CV, and 6 mL fractions were  
527 collected throughout. All of the fractions containing protein were pooled and concentrated to 1  
528 mg/mL using an Amicon centrifugal filter with a 10 kDa MWCO, the buffer was exchanged to PBS,  
529 it was filtered through a 0.2 um filter, aliquoted, and frozen at -80°C. Protein expression and  
530 purification resulted in a clear band by western blot (Figure S4A) and a clean doublet pattern by  
531 coomassie (Figure S4B) closely resembling that seen in the plasma crosslinking results (Figure  
532 1C) in both reduced and non-reduced conditions. For the 50mL expression of *DtABG*, *EtABG*,  
533 and mutant OsABG proteins, a 10% ratio of p1 virus to media was used and the supernatant was  
534 collected after 72 hours, to which 1 mL of Qiagen Ni-NTA resin washed and equilibrated in Buffer  
535 A (20 mM Sodium Phosphate, 300 mM NaCl, pH=7.4) was added. This was mixed overnight at  
536 4°C and then packed into a 1 mL Bio-Scale column, washed with 3 CV of Buffer A, washed with  
537 5 CV of 5% Buffer B (20 mM Sodium Phosphate, 300 mM NaCl, 500 mM imidazole, pH=7.4), and  
538 eluted with 5 CV of 50% Buffer B. Fractions containing protein were buffer exchanged into PBS,  
539 and the final concentrations were approximately 0.2 mg/mL, with varying final volumes. Protein  
540 expression and purification resulted in a clear band by western blot (Figure S4C,E,G,I,K), and a  
541 clean doublet by coomassie (Figure S4D,F,H,J,L) in both reduced and non-reduced conditions.

542

### 543 **Determination of dissociation constant using Microscale Thermophoresis (MST)**

544 To determine the binding affinity of OsABG for PTX, we used Microscale Thermophoresis  
545 (MST) to determine the dissociation constant ( $K_D$ ). To do this, we used the Monolith system  
546 (Nanotemper Technologies, München, Germany). Purified OsABG protein was labeled using the  
547 protein labeling kit Red-NHS 2nd generation (MO-L011, Nanotemper) which dyes primary lysine  
548 residues in the protein. The kit was used following manufacturer instructions, however a 1.5x  
549 excess of dye was used instead of 3x as this was found to better achieve a degree of labeling of  
550 ~0.5. To remove aggregates during the assay, PBS-Tween was used for protein labeling and all  
551 dilutions. The labeled protein was centrifuged for 10 minutes at 20,000g on a benchtop centrifuge,  
552 and the supernatant was taken to further remove any aggregation. The concentration was  
553 measured prior to calculating and setting up dilution series. A final concentration of 10nM OsABG  
554 was used, and a 16 tube 2x serial dilution series of PTX 251D was made with the highest  
555 concentration being 1000uM. The concentration of DMSO was maintained consistent across the



556 dilution series. The labeled OsABG was incubated for 10 minutes prior to loading into capillaries,  
557 and three biological replicates were pipetted and run separately. The Monolith premium capillaries  
558 (MO-K025, Nanotemper) were used, the MST power was set to Medium, and the excitation power  
559 was set to auto-detect. The three replicates were compiled and plotted together using GraphPad  
560 Prism (GraphPad Software, San Diego, California), and a dissociation model was fit to the data  
561 to calculate the  $K_D$ . The raw data is included in the supplementary information (will be included  
562 with full submission).

563

#### 564 **Determination of free versus bound alkaloids**

565 Solutions with 4  $\mu\text{M}$  of OsABG protein, 4  $\mu\text{M}$  of either PTX **251D** or nicotine, and a final  
566 volume of 100  $\mu\text{L}$  were made and incubated for one hour at room temperature. This was  
567 transferred to a 3 kDa MWCO centrifugal filter (UFC500396, Millipore Sigma, Burlington, MA) and  
568 spun at max speed on a benchtop centrifuge at 4C for 45 minutes. The top and bottom fractions  
569 were brought up to 100  $\mu\text{L}$  with ultrapure water and transferred to new tubes, where 300  $\mu\text{L}$  of 2:1  
570 Acetonitrile:Methanol was added, after which they were vortexed and centrifuged at max speed  
571 on a benchtop centrifuge at 4C for 10 minutes. The supernatant was transferred to autosampler  
572 vials for quantitation of the amount of alkaloid in each fraction with mass spectrometry. Each  
573 condition was run in triplicate. Samples were analyzed using an Agilent Quadrupole time-of-flight  
574 LC-MS instrument, with MS analysis performed by electrospray ionization (ESI) in positive mode.  
575 Metabolites were separated with an Eclipse Plus C18 column (A959961-902, Agilent, Santa  
576 Clara, CA) with normal phase chromatography. Mobile phases were: buffer A (water with 0.1%  
577 formic acid) and buffer B (90% acetonitrile, 10% water with 0.1% formic acid). The flow rate was  
578 maintained constant at 0.7 mL/min throughout the LC protocol. The LC gradient elution was set  
579 as follows: starting at 5% B held till 0.51 minutes, linear gradient from 5 to 25% B in 1.5 minutes,  
580 linear gradient from 25 to 50% B in 23 minutes, linear gradient from 50 to 95% B in 30 seconds,  
581 95% B held for 2 minutes, linear gradient from 95 to 5% B in 1 minute, and 5% B held for 1.5  
582 minutes to equilibrate the column to the initial conditions. The total run time was 30 minutes and  
583 the injection volume was 10  $\mu\text{L}$ . Data was analyzed using the Agilent MassHunter software; the  
584 extracted ion chromatograms for PTX were searched using the exact mass  $M+1$  of 252.2333, and  
585 nicotine was searched using the exact mass  $M+1$  of 163.123, with a tolerance of a symmetric +/-  
586 100 ppm. Extracted ion chromatograms were smoothed once before automatically integrating to  
587 get the abundance values. Abundance values were used to calculate the fractions above and  
588 below the filter for each replicate, which were then plotted with GraphPad. All raw data is provided  
589 as mzXML files through DataDryad (accessing information will be added for full submission).

590

#### 591 **Field collections of *Oophaga sylvatica***

592 The frog samples used in this paper are the same as those used for the project described  
593 in Moskowitz *et al.*, 2022 [66]. For each location, 10 *O. sylvatica* individuals were collected under  
594 collection permit 0013-18 IC-FAU-DNB/MA issued by the Ministerio del Ambiente de Ecuador,  
595 between the hours of 7:00-18:00 during early May to early June 2019. All individuals were  
596 euthanized the same day as collection. Prior to euthanizing, frogs were sexed, weighed, and the  
597 snout-vent length was measured. Orajel (10% benzocaine) was used as an anesthetic prior to  
598 cervical dislocation. Once euthanized, frogs were immediately dissected and the liver, intestines,  
599 and half of the dorsal skin were stored in RNAlater in cryotubes at room temperature. The other

600 half of the dorsal skin was placed in methanol in glass tubes at room temperature. Once back in  
601 the lab, all tissues were stored at -20°C until further processing. All tissues were transported to  
602 the United States under CITES permits 19EC000036/VS, 19EC000037/VS, 19EC000038/VS.

603

#### 604 **Alkaloid extraction, detection, and analysis**

605 All following steps were performed under a hood. Skins were taken out of methanol with  
606 forceps and weighed. From the methanol that the skin was stored in, 1 mL was taken and syringe  
607 filtered through a 0.45 $\mu$  PTFE filter (44504-NP, Thermo Scientific) into the new glass vial with a  
608 PTFE cap (60940A-2, Fisher) filled with 25  $\mu$ L of 1  $\mu$ g/ $\mu$ L (-)-Nicotine (N3876-100ML, Sigma  
609 Aldrich), for a total of 25  $\mu$ g of added nicotine. Tubes were capped and vortexed, and stored at -  
610 80°C celsius for 24 hours, during which proteins and lipids should precipitate. After 24 hours,  
611 tubes were taken out of the -80°C and quickly syringe filtered through a 0.45 $\mu$  PTFE filter again  
612 into a new glass vial. A 100  $\mu$ L aliquot was added to an GC-MS autosampler vial, and remaining  
613 solution was stored in the original capped vial at -80°C.

614 GC-MS analysis was performed on a Shimadzu GCMS-QP2020 instrument with a  
615 Shimadzu 30m x 0.25 mmID SH-Rxi-5Sil MS column closely following the protocol outlined in  
616 Saporito *et al.*, 2010 [67]. In brief, GC separation of alkaloids was achieved using a temperature  
617 program from 100 to 280°C at a rate of 10°C per minute with He as the carrier gas (flow rate: 1  
618 mL/min). This was followed by a 2 minute hold and additional ramp to 320°C at a rate of  
619 10°C/minute for column protection reasons, and no alkaloids appeared during this part of the  
620 method. Compounds were analyzed with electron impact-mass spectrometry (EI-MS). The GC-  
621 MS data files were exported as CDF files and the Global Natural Products Social Network (GNPS)  
622 was used to perform the deconvolution and library searching against the AMDIS (NIST) database  
623 to identify all compounds (<https://gnps.ucsd.edu>) [68]. For deconvolution (identification of peaks  
624 and abundance estimates) the default parameters were used, for the library search the precursor  
625 ion mass tolerance was set to 20000 Da and the MS/MS fragment ion tolerance to 0.5 Da. The  
626 resulting dataset was filtered to keep only compounds that matched to our spiked-in nicotine  
627 standard, alkaloids previously found in poison frogs from the Daly 2005 database [15], or  
628 compounds with the same base ring structure and R groups as the classes defined in Daly 2005.  
629 All GC-MS data as CDF files are available through the GNPS public data repository (accessing  
630 information will be added for full submission).

631 Once the feature table from the GNPS deconvolution was filtered to only include only  
632 poison frog alkaloids and nicotine, the abundances values were normalized by dividing by the  
633 nicotine standard and skin weight. This filtered and normalized feature table was used for all  
634 further analyses and visualizations. All steps were carried out with R version 4.0.4, and code is  
635 included in supplementary data (will be included with full submission).

636

#### 637 **RNA extraction and library preparation**

638 RNA extraction followed the Trizol (15596018, Thermo Fisher) RNA isolation protocol  
639 outlined in Caty *et al.* 2019 [27] according to the manufacturer's instructions, and with sample  
640 randomization to avoid batch effects. RNA quality was measured on a Agilent TapeStation RNA  
641 screentape (Agilent, Santa Clara, CA), and quantified using a Qubit Broad Range RNA kit  
642 (Q10210, Invitrogen). In the liver and intestines, samples with RIN scores greater than 5 were  
643 kept, RNA was normalized to the same Qubit concentration, and mRNA was isolated and library

644 prepped using the NEB Directional RNA sequencing kit (E7765L, New England Biolabs) with the  
645 PolyA purification bundle (E7490L, New England Biolabs) and 96 Unique Dual Indices (E7765L,  
646 New England Biolabs). The skin RIN scores were much lower, signaling potential RNA  
647 degradation, ribosomal degradation was instead used to isolate mRNA. Following normalization  
648 within all skin RNA samples to the same Qubit concentration, we used the Zymo RiboFree Total  
649 RNA Library Prep kit (R3003-B, Zymo Research, Irvine, CA) following manufacturer instructions.  
650 After library prep for all tissues was complete library size was quantified with the Agilent  
651 TapeStation D1000 screentape, and concentration was measured with the Qubit dsDNA high  
652 sensitivity kit (Q33231, Invitrogen). All libraries within a tissue type were pooled to equimolar  
653 amounts and sequenced on two lanes of an Illumina NovaSeq (Illumina, San Diego, CA) machine  
654 to obtain 150 bp paired-end reads.

655

### 656 **RNA expression analysis and identification of *O. sylvatica* serpinA genes**

657 Analysis of RNA expression levels followed the protocol outlined by Payne *et al.*, 2022  
658 [69]. The Trim-galore! wrapper tool [70] was used to trim adapter sequences with cutadapt [71]  
659 and quality filter the reads (trim\_galore --paired --phred33 --length 36 -q 30 --stringency 1 -e  
660 0.001). All trimmed reads are available through the NCBI BioProject (accessing information will  
661 be added for full submission). *Kallisto* [72] was used to pseudoalign the reads to a reference  
662 created with the coding sequence of the annotated *O. sylvatica* genome. These abundances were  
663 combined into a matrix, and the trimmed-mean of M-values (TMM) normalized counts were used  
664 for all further analyses. Additional serpinA genes were found in the genome by searching for all  
665 genes annotated with “serpina” in the header, and by blasting the OsABG protein sequence  
666 against the genome (e-value < 1e-60) and including any additional genes not annotated with  
667 “serpina.” Four sequences were removed because they were exact matches of the full gene  
668 (OopSylGTT00000004683), the N-terminal end (OopSylGTT00000004650,  
669 OopSylGTT00000004685), or the C-terminal (OopSylGTT00000004676) end sequence of  
670 another serpinA gene, and therefore could be potential duplications caused by annotation or  
671 assembly errors. To create the protein tree (Figure 6D), ClustalW was used to align the  
672 sequences, a distance matrix was created using identity, and neighbor joining was used to  
673 construct the tree. The albumin gene was determined by blasting the protein sequences of  
674 *Xenopus laevis* albumin A (Uniprot #P08759), *X. laevis* albumin B (Uniprot #P14872), and the  
675 Asian toad *Bombina maxima* albumin (Uniprot #Q3T478) against the *O. sylvatica* genome. In all  
676 three cases, the top hit was the same (OopSylGTT00000003067), therefore this was assumed to  
677 be the most likely albumin candidate in the genome and was used to plot the TMM expression for  
678 comparison. All plots were created in R version 4.0.4, and all analysis and plotting code is  
679 available in the supplementary files (will be included with full submission).

680

### 681 **5. ACKNOWLEDGEMENTS**

682 The authors acknowledge that this research was conducted on the ancestral lands of the  
683 Muwekma Ohlone people at Stanford, and the Kichwa, Épera, Chachi, and Awa people of  
684 Ecuador. We understand the implications of the historical and present colonialism these people  
685 experience and celebrate their continued stewardship of their lands. We thank María Dolores  
686 Guarderas and Andrea Terán Valdéz for their assistance coordinating field work and their  
687 kindness. We would also like to thank the Laboratory of Organismal Biology, the Long Lab, the

688 Soh lab, Joel Francis, Cheyenne Payne, and Julia Tanzo for helpful discussions and guidance  
689 throughout this project. Centro Jambatu researchers thank Wikiri and Saint Louis Zoo for their  
690 commitment and sustained support for amphibian research.

691

## 692 **6. FUNDING**

693 This work was supported by the National Science Foundation (IOS-1822025) and the New York  
694 Stem Cell Foundation (LAO). This work was also supported by the Vincent Coates Foundation  
695 Mass Spectrometry Laboratory, Stanford University Mass Spectrometry (RRID:SCR\_017801)  
696 utilizing the Thermo Orbitrap Eclipse nanoLC/MS system (RRID:SCR\_022212) that was  
697 purchased with funding from National Institutes of Health Shared Instrumentation grant  
698 1S10OD030473. This work was supported in part by NIH P30 CA124435 utilizing the Stanford  
699 Cancer Institute Proteomics/Mass Spectrometry Shared Resource. AAB is supported by a NSF  
700 Graduate Research Fellowship (DGE-1656518) and an HHMI Gilliam Fellowship ([www.hhmi.org](http://www.hhmi.org),  
701 GT13330). LAO is a New York Stem Cell Foundation – Robertson Investigator.

702

## 703 **7. DATA ACCESSIBILITY**

704 All raw data, analysis scripts, and intermediate data analysis files will be publicly available at the  
705 time of publication, and included with a full submission. This includes the *O. sylvatica* and *A.*  
706 *femoralis* genome, which will be published with another manuscript currently in preparation to be  
707 submitted in the coming weeks. Depending on the file type, these will be available through NCBI  
708 (BioProjects/SRA), DataDryad, GNPS, or as part of a zipped file included with the manuscript.

709

## 710 **8. COMPETING INTERESTS**

711 The authors have filed a provisional patent based on the OsABG protein.

712

## 713 **9. AUTHOR CONTRIBUTIONS**

714 AAB - Conceptualization, Methodology, Validation, Formal Analysis, Investigation, Data Curation,  
715 Writing - Original Draft, Writing - Review and Editing, Visualization

716 MDMG - Methodology, Validation, Formal Analysis, Investigation

717 AER - Methodology, Validation, Formal Analysis, Investigation

718 ET - Methodology, Validation, Investigation

719 LAC - Methodology, Resources

720 HTS - Methodology, Resources

721 JZL - Conceptualization, Methodology, Resources, Writing - Review and Editing, Supervision

722 LAO - Conceptualization, Resources, Writing - Review and Editing, Supervision, Funding  
723 Acquisition

724



725 **10. SUPPLEMENTARY MATERIAL**

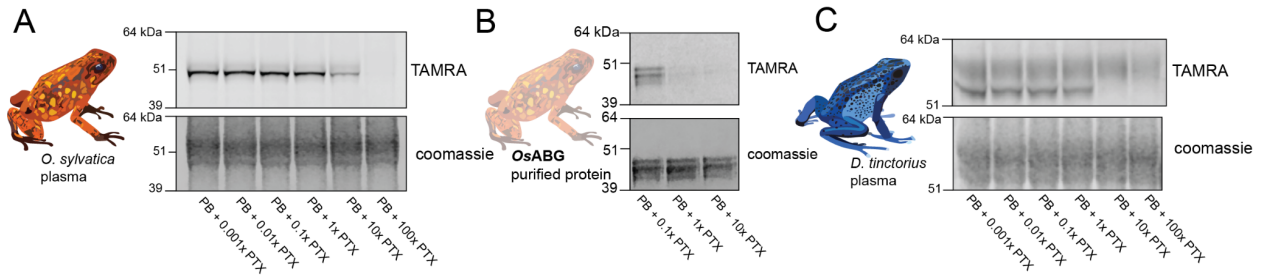

726 **Figure S1: Dose response of photoprobe competition** (A) Plasma from *O. sylvatica* shows crosslinking  
727 to the photoprobe, and competition by pumiliotoxin **251D** (PTX) occurs when there is 10:1 PTX:photoprobe  
728 concentration in the reaction. (B) Purified *O. sylvatica* Alkaloid Binding Globulin (ABG) shows crosslinking  
729 to the photoprobe and competition by PTX when there is a 1:1 PTX:photoprobe concentration. (C) Plasma  
730 from *D. tinctorius* shows crosslinking to the photoprobe, and competition by PTX occurs when there is 10:1  
731 PTX:photoprobe concentration in the reaction.  
732

733  
734  
735

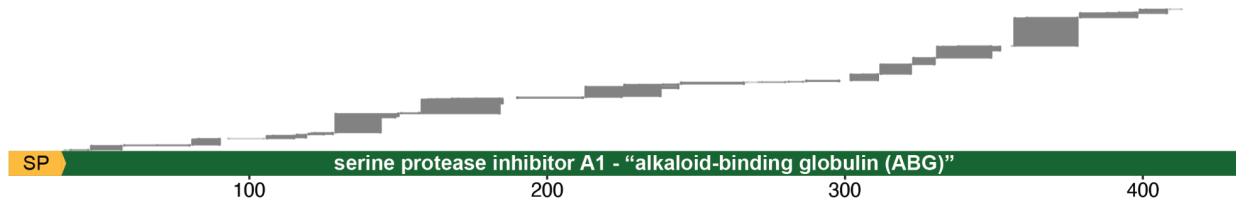

736 **Figure S2: Peptide coverage over ABG protein sequence** All unique peptides from one replicate of the  
737 proteomics were mapped onto the protein sequence of *O. sylvatica* ABG, showing that there were  
738 peptides covering the full length of the protein.  
739

740

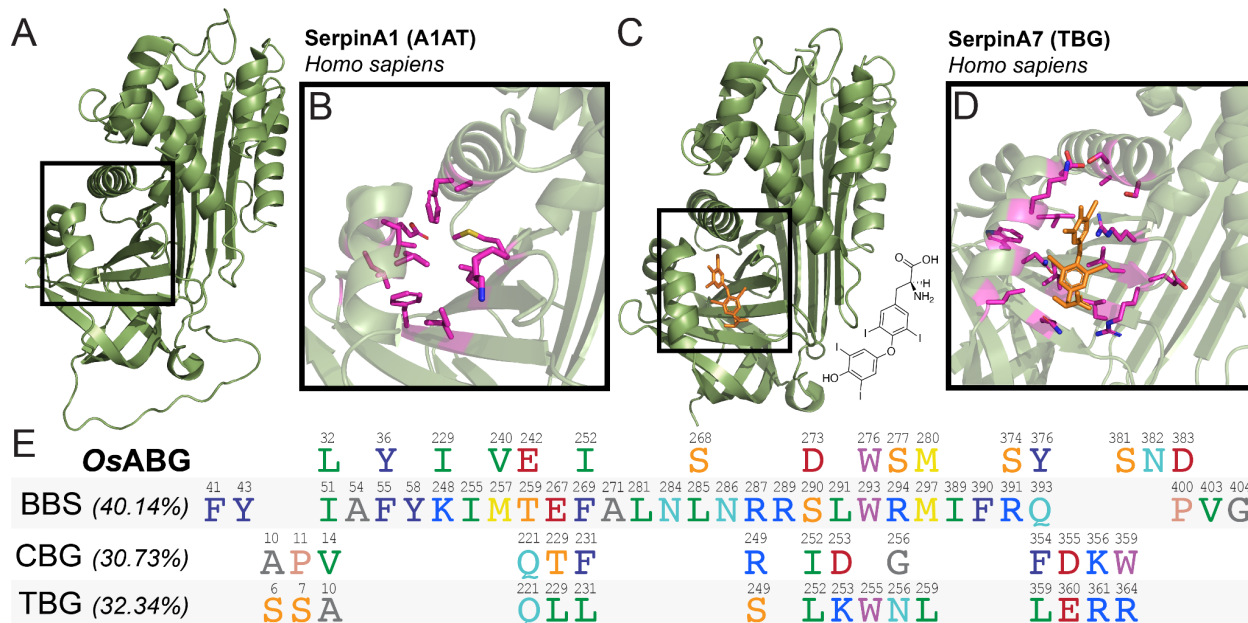

741  
 742 **Figure S3: Structure and binding pockets of closely related serpinA proteins** (A) Crystal structure for  
 743 human SerpinA1/alpha-1-antitrypsin (PDB# 1HP7) contains the structural elements of other serpin binding  
 744 pockets (black box), however is not documented to have small-molecule binding capabilities. (B) Close-up  
 745 of A1AT (PDB# 1HP7), with pocket residues highlighted in magenta. (C) Crystal structure for human  
 746 SerpinA7/thyroxine-binding globulin (PDB# 2RIW) binds thyroxine (orange) in the same structural pocket  
 747 as other serpins. (D) Close-up of thyroxine binding pocket of TBG (PDB# 2RIW), with proximal residues  
 748 highlighted in magenta. Thyroxine structure is displayed on the top right. (E) Alignment of proximal residues  
 749 (within 5 angstroms of small molecule) across small molecule binding serpins OsABG, biliverdin binding  
 750 serpin (BBS, PDB# 7RBW), corticosteroid binding globulin (CBG, PDB# 2V95), and thyroxine binding  
 751 globulin (TBG, PDB# 2RIW) shows that most residues that may be involved in coordinating small molecule  
 752 binding are not conserved, despite the structural conservation of the binding pocket. Percentages indicate  
 753 the total percent identity of the protein sequences, the small number above each residue indicates the  
 754 position of that amino acid in the protein sequence. Only proximal residues are shown, blank spaces are  
 755 not representative of any specific sequence or spacing.  
 756

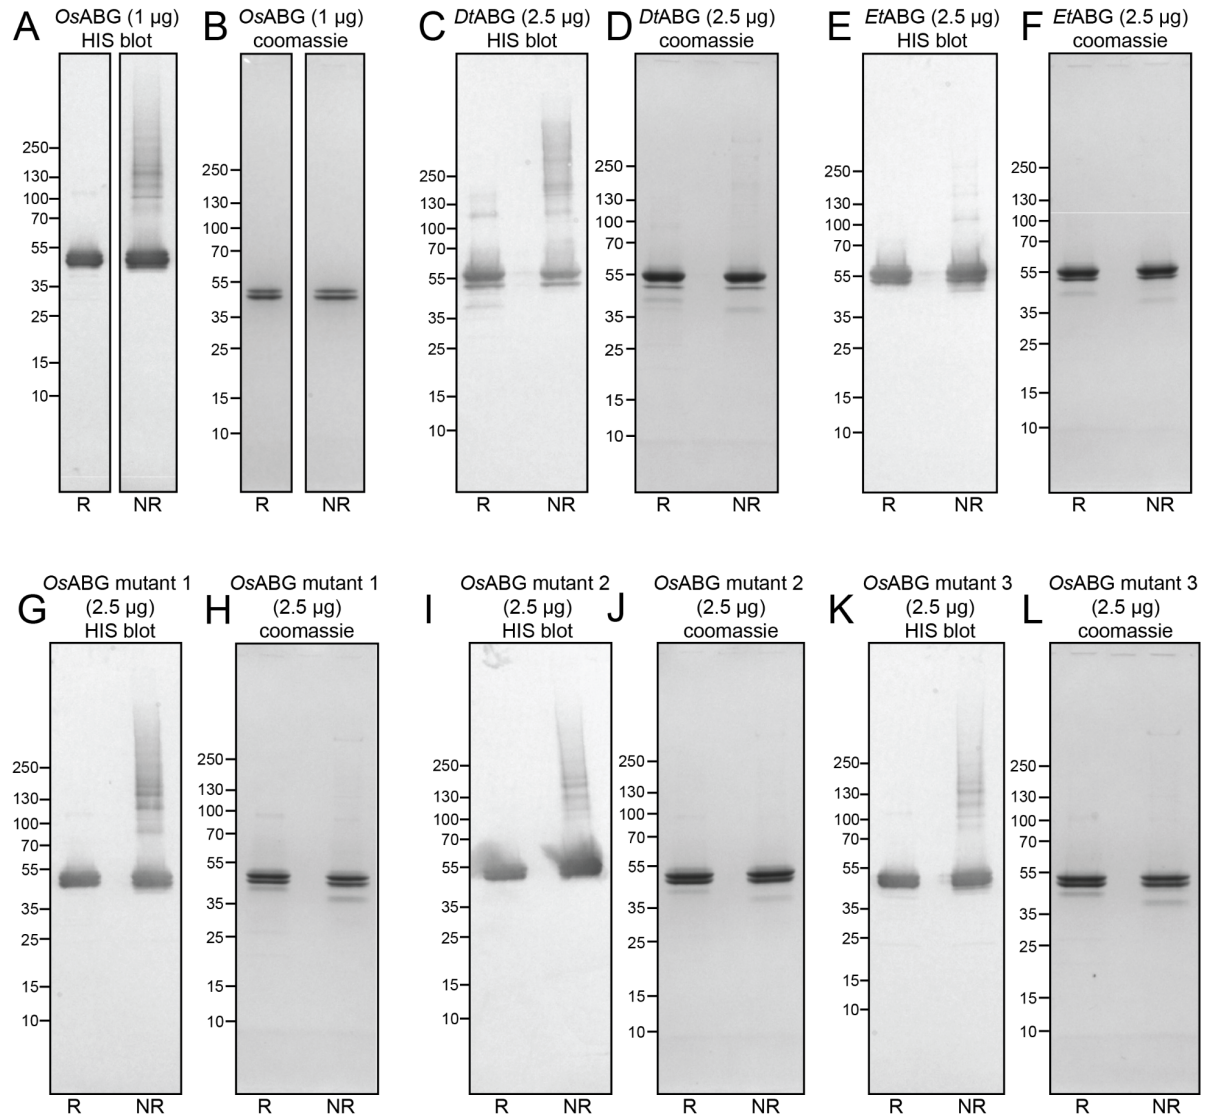

757

758

759

760

761

762

763

764

765

766

767

768

769

770

**Figure S4: Recombinant expression and purification of Alkaloid Binding Globulin (ABG) proteins in insect cells.** HIS blot (A) and coomassie (B) of the recombinantly expressed and purified *O. sylvatica* alkaloid-binding globulin (OsABG) show a clear doublet pattern in both reduced (R) and non-reduced (NR) conditions. HIS blot (C) and coomassie (D) of recombinantly expressed *D. tinctorius* ABG, identified by the most-homologous protein to OsABG in the *D. tinctorius* transcriptome, show a clear purification. HIS blot (E) and coomassie (F) of recombinantly expressed *E. tricolor* ABG, identified by the most-homologous protein to OsABG in the *E. tricolor* transcriptome, show a clear purification. HIS blot (G) and coomassie (H) of recombinantly expressed OsABG mutant 1 (Y36A, W276A, S374A, D383A) shows a clear purification. HIS blot (I) and coomassie (J) of recombinantly expressed OsABG mutant 2 (Y36A, S268A, D273A, D383A) shows a clear purification. HIS blot (K) and coomassie (L) of recombinantly expressed OsABG mutant 3 (D383A) shows a clear purification.

771 **11. REFERENCES**

- 772 1. Wright SN. Irreversible block of human heart (hH1) sodium channels by the plant alkaloid  
773 lappaconitine. *Mol Pharmacol.* 2001;59: 183–192.
- 774 2. Wang S-Y, Tikhonov DB, Mitchell J, Zhorov BS, Wang GK. Irreversible block of cardiac  
775 mutant Na<sup>+</sup> channels by batrachotoxin. *Channels .* 2007;1: 179–188.
- 776 3. Efimova SS, Zakharova AA, Ostroumova OS. Alkaloids modulate the functioning of ion  
777 channels produced by antimicrobial agents via an influence on the lipid host. *Front Cell Dev*  
778 *Biol.* 2020;8: 537.
- 779 4. Asakawa M, Matsumoto T, Umezaki K, Kaneko K, Yu X, Gomez-Delan G, et al. Toxicity  
780 and toxin composition of the greater blue-ringed octopus from Ishigaki island, Okinawa  
781 Prefecture, Japan. *Toxins .* 2019;11. doi:10.3390/toxins11050245
- 782 5. Matsumura K. Tetrodotoxin as a pheromone. *Nature.* 1995;378: 563–564.
- 783 6. Bucciarelli GM, Li A, Zimmer RK, Kats LB, Green DB. Quantifying tetrodotoxin levels in the  
784 California newt using a non-destructive sampling method. *Toxicon.* 2014;80: 87–93.
- 785 7. Hartmann T, Theuring C, Schmidt J, Rahier M, Pasteels JM. Biochemical strategy of  
786 sequestration of pyrrolizidine alkaloids by adults and larvae of chrysomelid leaf beetles. *J*  
787 *Insect Physiol.* 1999;45: 1085–1095.
- 788 8. Cogni R, Trigo JR, Futuyama DJ. A free lunch? No cost for acquiring defensive plant  
789 pyrrolizidine alkaloids in a specialist arctiid moth (*Utetheisa ornatrix*). *Mol Ecol.* 2012;21:  
790 6152–6162.
- 791 9. Wang L, Beuerle T, Timbilla J, Ober D. Independent recruitment of a flavin-dependent  
792 monooxygenase for safe accumulation of sequestered pyrrolizidine alkaloids in  
793 grasshoppers and moths. *PLoS One.* 2012;7: e31796.
- 794 10. Strauss AS, Peters S, Boland W, Burse A. ABC transporter functions as a pacemaker for  
795 sequestration of plant glucosides in leaf beetles. *Elife.* 2013;2: e01096.
- 796 11. Yotsu-Yamashita M, Sugimoto A, Terakawa T, Shoji Y, Miyazawa T, Yasumoto T.  
797 Purification, characterization, and cDNA cloning of a novel soluble saxitoxin and  
798 tetrodotoxin binding protein from plasma of the puffer fish, *Fugu pardalis*. *Eur J Biochem.*  
799 2001;268: 5937–5946.
- 800 12. Yotsu-Yamashita M, Nagaoka Y, Muramoto K, Cho Y, Konoki K. Pufferfish Saxitoxin and  
801 Tetrodotoxin Binding Protein (PSTBP) analogues in the blood plasma of the pufferfish. *Mar*  
802 *Drugs.* 2018;16. doi:10.3390/md16070224
- 803 13. Abderemane-Ali F, Rossen ND, Kobiela ME, Craig RA, Garrison CE, Chen Z, et al.  
804 Evidence that toxin resistance in poison birds and frogs is not rooted in sodium channel  
805 mutations and may rely on “toxin sponge” proteins. *J Gen Physiol.* 2021;153.  
806 doi:10.1085/jgp.202112872
- 807 14. Daly JW, Kaneko T, Wilham J, Garraffo HM, Spande TF, Espinosa A, et al. Bioactive  
808 alkaloids of frog skin: Combinatorial bioprospecting reveals that pumiliotoxins have an



- 809 arthropod source. *Proceedings of the National Academy of Sciences*. 2002;99: 13996–  
810 14001.
- 811 15. Daly JW, Spande TF, Garraffo HM. Alkaloids from amphibian skin: a tabulation of over  
812 eight-Hundred compounds. *J Nat Prod*. 2005;68: 1556–1575.
- 813 16. Saporito RA, Spande TF, Martin Garraffo H, Donnelly MA. Arthropod alkaloids in poison  
814 frogs: a review of the “dietary hypothesis.” *HETEROCYCLES*. 2009. p. 277.  
815 doi:10.3987/rev-08-sr(d)11
- 816 17. Santos JC, Coloma LA, Cannatella DC. Multiple, recurring origins of aposematism and diet  
817 specialization in poison frogs. *Proceedings of the National Academy of Sciences*. 2003;100:  
818 12792–12797.
- 819 18. Summers K. Convergent evolution of bright coloration and toxicity in frogs. *Proceedings of*  
820 *the National Academy of Sciences*. 2003;100: 12533–12534.
- 821 19. Daly JW, Secunda SI, Garraffo HM, Spande TF, Wisnieski A, Cover JF. An uptake system  
822 for dietary alkaloids in poison frogs (*Dendrobatidae*). *Toxicon*. 1994;32: 657–663.
- 823 20. Caldwell JP. The evolution of myrmecophagy and its correlates in poison frogs (Family  
824 *Dendrobatidae*). *J Zool*. 1996;240: 75–101.
- 825 21. Darst CR, Menéndez-Guerrero PA, Coloma LA, Cannatella DC. Evolution of dietary  
826 specialization and chemical defense in poison frogs (*Dendrobatidae*): a comparative  
827 analysis. *Am Nat*. 2004;165: 56–69.
- 828 22. Toft CA. Feeding ecology of thirteen syntopic species of anurans in a seasonal tropical  
829 environment. *Oecologia*. 1980;45: 131–141.
- 830 23. Vandendriessche T, Abdel-Mottaleb Y, Maertens C, Cuypers E, Sudau A, Nubbemeyer U,  
831 et al. Modulation of voltage-gated Na<sup>+</sup> and K<sup>+</sup> channels by pumiliotoxin 251D: A “joint  
832 venture” alkaloid from arthropods and amphibians. *Toxicon*. 2008;51: 334–344.
- 833 24. Daly JW, Gusovsky F, McNeal ET, Secunda S, Bell M, Creveling CR, et al. Pumiliotoxin  
834 alkaloids: A new class of sodium channel agents. *Biochem Pharmacol*. 1990;40: 315–326.
- 835 25. Okada T, Wu N, Takashima K, Ishimura J, Morita H, Ito T, et al. Total synthesis of  
836 decahydroquinoline poison frog alkaloids ent-cis-195A and cis-211A. *Molecules*. 2021. p.  
837 7529. doi:10.3390/molecules26247529
- 838 26. Spande TF, Garraffo HM, Edwards MW, Yeh HJC, Pannell L, Daly JW. Epibatidine: a novel  
839 (chloropyridyl)azabicycloheptane with potent analgesic activity from an Ecuadoran poison  
840 frog. *Journal of the American Chemical Society*. 1992. pp. 3475–3478.  
841 doi:10.1021/ja00035a048
- 842 27. Caty SN, Alvarez-Buylla A, Byrd GD, Vidoudez C, Roland AB, Tapia EE, et al. Molecular  
843 physiology of chemical defenses in a poison frog. *J Exp Biol*. 2019;222: jeb204149.
- 844 28. Alvarez-Buylla A, Payne CY, Vidoudez C, Trauger SA, O’Connell LA. Molecular physiology  
845 of pumiliotoxin sequestration in a poison frog. *PLoS One*. 2022;17: e0264540.
- 846 29. O’Connell LA, LS50: Integrated Science Laboratory Course, O’Connell JD, Paulo JA,

- 847 Trauger SA, Gygi SP, et al. Rapid toxin sequestration modifies poison frog physiology. *J*  
848 *Exp Biol.* 2021;224. doi:10.1242/jeb.230342
- 849 30. Tarvin RD, Borghese CM, Sachs W, Santos JC, Lu Y, O'Connell LA, et al. Interacting  
850 amino acid replacements allow poison frogs to evolve epibatidine resistance. *Science.*  
851 2017;357: 1261–1266.
- 852 31. Kiefer H, Lindstrom J, Lennox ES, Singer SJ. Photo-affinity labeling of specific  
853 acetylcholine-binding sites on membranes. *Proc Natl Acad Sci U S A.* 1970;67: 1688–1694.
- 854 32. Shinozawa T, Sokabe M, Terada S, Matsusaka H, Yoshizawa T. Detection of cyclic GMP  
855 binding protein and ion channel activity in frog rod outer segments. *J Biochem.* 1987;102:  
856 281–290.
- 857 33. Gupta R, Brunak S. Prediction of glycosylation across the human proteome and the  
858 correlation to protein function. *Pac Symp Biocomput.* 2002; 310–322.
- 859 34. Chan WL, Carrell RW, Zhou A, Read RJ. How changes in affinity of corticosteroid-binding  
860 globulin modulate free cortisol concentration. *J Clin Endocrinol Metab.* 2013;98: 3315–  
861 3322.
- 862 35. Pemberton PA, Stein PE, Pepys MB, Potter JM, Carrell RW. Hormone binding globulins  
863 undergo serpin conformational change in inflammation. *Nature.* 1988;336: 257–258.
- 864 36. Gardill BR, Vogl MR, Lin H-Y, Hammond GL, Muller YA. Corticosteroid-binding globulin:  
865 structure-function implications from species differences. *PLoS One.* 2012;7: e52759.
- 866 37. Lewis JG, Bagley CJ, Elder PA, Bachmann AW, Torpy DJ. Plasma free cortisol fraction  
867 reflects levels of functioning corticosteroid-binding globulin. *Clin Chim Acta.* 2005;359: 189–  
868 194.
- 869 38. Taboada C, Brunetti AE, Lyra ML, Fitak RR, Faigón Soverna A, Ron SR, et al. Multiple  
870 origins of green coloration in frogs mediated by a novel biliverdin-binding serpin. *Proc Natl*  
871 *Acad Sci U S A.* 2020;117: 18574–18581.
- 872 39. Robbins J. Thyroxine transport and the free hormone hypothesis. *Endocrinology.* 1992;131:  
873 546–547.
- 874 40. Siiteri PK, Murai JT, Raymoure WJ, Kuhn RW, Hammond GL, Nisker JA. The serum  
875 transport of steroid hormones. *Proceedings of the 1981 Laurentian Hormone Conference.*  
876 1982. pp. 457–510. doi:10.1016/b978-0-12-571138-8.50016-0
- 877 41. Manoilov KY, Ghosh A, Almo SC, Verkhusha VV. Structural and functional characterization  
878 of a biliverdin-binding near-infrared fluorescent protein from the serpin superfamily. *J Mol*  
879 *Biol.* 2022;434: 167359.
- 880 42. Garraffo HM, Caceres J, Daly JW, Spande TF, Andriamaharavo NR, Andriantsiferana M.  
881 Alkaloids in Madagascan frogs (*Mantella*): pumiliotoxins, indolizidines, quinolizidines, and  
882 pyrrolizidines. *J Nat Prod.* 1993;56: 1016–1038.
- 883 43. Fischer EK, Roland AB, Moskowitz NA, Vidoudez C, Ranaivorazo N, Tapia EE, et al.  
884 Mechanisms of convergent egg provisioning in poison frogs. *Curr Biol.* 2019;29: 4145–  
885 4151.e3.

- 886 44. Clark VC, Raxworthy CJ, Rakotomalala V, Sierwald P, Fisher BL. Convergent evolution of  
887 chemical defense in poison frogs and arthropod prey between Madagascar and the  
888 Neotropics. *Proc Natl Acad Sci U S A*. 2005;102: 11617–11622.
- 889 45. McGugan JR, Byrd GD, Roland AB, Caty SN, Kabir N, Tapia EE, et al. Ant and mite  
890 diversity drives toxin variation in the little devil poison frog. *J Chem Ecol*. 2016;42: 537–551.
- 891 46. Santos JC, Tarvin RD, O’Connell LA. A Review of chemical defense in poison frogs  
892 (Dendrobatidae): ecology, pharmacokinetics, and autoresistance. *Chemical Signals in*  
893 *Vertebrates* 13. 2016. pp. 305–337. doi:10.1007/978-3-319-22026-0\_21
- 894 47. Fagerberg L, Hallström BM, Oksvold P, Kampf C, Djureinovic D, Odeberg J, et al. Analysis  
895 of the human tissue-specific expression by genome-wide integration of transcriptomics and  
896 antibody-based proteomics. *Mol Cell Proteomics*. 2014;13: 397–406.
- 897 48. Merkin J, Russell C, Chen P, Burge CB. Evolutionary dynamics of gene and isoform  
898 regulation in Mammalian tissues. *Science*. 2012;338: 1593–1599.
- 899 49. Yu Y, Fuscoe JC, Zhao C, Guo C, Jia M, Qing T, et al. A rat RNA-Seq transcriptomic  
900 BodyMap across 11 organs and 4 developmental stages. *Nat Commun*. 2014;5: 3230.
- 901 50. Pipes L, Li S, Bozinoski M, Palermo R, Peng X, Blood P, et al. The non-human primate  
902 reference transcriptome resource (NHPRTTR) for comparative functional genomics. *Nucleic*  
903 *Acids Res*. 2013;41: D906–14.
- 904 51. Doweiko JP, Nompleggi DJ. Reviews: The Role of Albumin in Human Physiology and  
905 Pathophysiology, Part III: Albumin and Disease States. *Journal of Parenteral and Enteral*  
906 *Nutrition*. 1991. pp. 476–483. doi:10.1177/0148607191015004476
- 907 52. Baker ME. Albumin, steroid hormones and the origin of vertebrates. *Journal of*  
908 *Endocrinology*. 2002. pp. 121–127. doi:10.1677/joe.0.1750121
- 909 53. Merlot AM, Kalinowski DS, Richardson DR. Unraveling the mysteries of serum albumin-  
910 more than just a serum protein. *Front Physiol*. 2014;5: 299.
- 911 54. Nonneman D, Rohrer GA, Wise TH, Lunstra DD, Ford JJ. A variant of porcine thyroxine-  
912 binding globulin has reduced affinity for thyroxine and is associated with testis size. *Biol*  
913 *Reprod*. 2005;72: 214–220.
- 914 55. Chen Z, Zakrzewska S, Hajare HS, Alvarez-Buylla A, Abderemane-Ali F, Bogan M, et al.  
915 Definition of a saxitoxin (STX) binding code enables discovery and characterization of the  
916 anuran saxiphilin family. *Proc Natl Acad Sci U S A*. 2022;119: e2210114119.
- 917 56. Tarvin RD, Santos JC, O’Connell LA, Zakon HH, Cannatella DC. Convergent substitutions  
918 in a sodium channel suggest multiple origins of toxin resistance in poison frogs. *Mol Biol*  
919 *Evol*. 2016;33: 1068–1081.
- 920 57. Refetoff S. Thyroid Hormone Transport Proteins: Thyroxine-Binding Globulin, Transthyretin,  
921 and Albumin. *Encyclopedia of Hormones*. 2003. pp. 483–490. doi:10.1016/b0-12-341103-  
922 3/00287-4
- 923 58. Hammond GL, Smith CL, Paterson NA, Sibbald WJ. A role for corticosteroid-binding  
924 globulin in delivery of cortisol to activated neutrophils. *J Clin Endocrinol Metab*. 1990;71:

- 925 34–39.
- 926 59. Kim JT, Jedrychowski MP, Wei W, Fernandez D, Fischer CR, Banik SM, et al. A Plasma  
927 Protein Network Regulates PM20D1 and N-Acyl Amino Acid Bioactivity. *Cell Chem Biol.*  
928 2020;27: 1130–1139.e4.
- 929 60. Wei W, Riley NM, Lyu X, Bertozzi CR, Long JZ. Protocol for cell type-specific labeling,  
930 enrichment, and proteomic profiling of plasma proteins in mice. *STAR Protoc.* 2021;2:  
931 101014.
- 932 61. Elias JE, Gygi SP. Target-decoy search strategy for increased confidence in large-scale  
933 protein identifications by mass spectrometry. *Nat Methods.* 2007;4: 207–214.
- 934 62. Jumper J, Evans R, Pritzel A, Green T, Figurnov M, Ronneberger O, et al. Highly accurate  
935 protein structure prediction with AlphaFold. *Nature.* 2021;596: 583–589.
- 936 63. Pettersen EF, Goddard TD, Huang CC, Couch GS, Greenblatt DM, Meng EC, et al. UCSF  
937 Chimera—a visualization system for exploratory research and analysis. *J Comput Chem.*  
938 2004;25: 1605–1612.
- 939 64. Trott O, Olson AJ. AutoDock Vina: improving the speed and accuracy of docking with a new  
940 scoring function, efficient optimization, and multithreading. *J Comput Chem.* 2010;31: 455–  
941 461.
- 942 65. Eberhardt J, Santos-Martins D, Tillack AF, Forli S. AutoDock Vina 1.2.0: New Docking  
943 Methods, Expanded Force Field, and Python Bindings. *J Chem Inf Model.* 2021;61: 3891–  
944 3898.
- 945 66. Moskowitz NA, Aurora-Alvarez-Buylla, Morrison CR, Chamba A, Rentería J, Tapia EE, et  
946 al. Poison frog diet and chemical defense are influenced by availability and selectivity for  
947 ants. doi:10.1101/2022.06.14.495949
- 948 67. Saporito RA, Donnelly MA, Madden AA, Garraffo HM, Spande TF. Sex-related differences  
949 in alkaloid chemical defenses of the dendrobatid frog *Oophaga pumilio* from Cayo Nancy,  
950 Bocas del Toro, Panama. *J Nat Prod.* 2010;73: 317–321.
- 951 68. Wang M, Carver JJ, Phelan VV, Sanchez LM, Garg N, Peng Y, et al. Sharing and  
952 community curation of mass spectrometry data with Global Natural Products Social  
953 Molecular Networking. *Nat Biotechnol.* 2016;34: 828–837.
- 954 69. Payne C, Bovio R, Powell DL, Gunn TR, Banerjee SM, Grant V, et al. Genomic insights into  
955 variation in thermotolerance between hybridizing swordtail fishes. *Mol Ecol.* 2022.  
956 doi:10.1111/mec.16489
- 957 70. Krueger F, James F, Ewels P, Afyounian E, Schuster-Boeckler BF. TrimGalore: v0. 6.7-DOI  
958 via Zenodo. Zenodo; 2021.
- 959 71. Martin M. Cutadapt removes adapter sequences from high-throughput sequencing reads.  
960 *EMBnet.journal.* 2011. p. 10. doi:10.14806/ej.17.1.200
- 961 72. Bray NL, Pimentel H, Melsted P, Pachter L. Near-optimal probabilistic RNA-seq  
962 quantification. *Nat Biotechnol.* 2016;34: 525–527.
